# Supplementary material for: Predictive Potential of Cmax Bioequivalence in Pilot Bioavailability/Bioequivalence Studies, through the Alternative ƒ2 Similarity Factor Method
Source: Pharmaceutics. 2023 Oct 20;15(10):2498. doi: 10.3390/pharmaceutics15102498 (PMC10610255; doi:10.3390/pharmaceutics15102498)
Supplement: Supplementary file 1 [file pharmaceutics-15-02498-s001.zip › pharmaceutics-2614531-supplementary.pdf]

Predictive Potential of C<sub>max</sub> Bioequivalence  
in Pilot Bioavailability/Bioequivalence Studies,  
Through the Alternative f<sub>2</sub> Similarity Factor

Sara Carolina Henriques, Paulo Paixão, Luís Almeida, Nuno Elvas Silva

Supplementary Material  
Descriptive Statistics of Simulated Pharmacokinetic Data

# Contents

|                                                                                                         |           |
|---------------------------------------------------------------------------------------------------------|-----------|
| <b>S.1. Simulations Where Test Product Presents a Lower Bioavailability than the Reference Product</b>  | <b>3</b>  |
| S.1.1. Simulated Volume of Distribution . . . . .                                                       | 3         |
| S.1.2. Simulated Plasma Concentrations . . . . .                                                        | 7         |
| S.1.3. Simulated Non-Compartmental Analysis Parameters . . . . .                                        | 11        |
| S.1.3.1. Maximum Observed Concentration . . . . .                                                       | 11        |
| S.1.3.2. Time of Maximum Observed Concentration . . . . .                                               | 14        |
| S.1.3.3. Area Under the Concentration-Time Curve . . . . .                                              | 16        |
| <b>S.2. Simulations Where Test Product Presents a Higher Bioavailability than the Reference Product</b> | <b>19</b> |
| S.2.1. Simulated Volume of Distribution . . . . .                                                       | 19        |
| S.2.2. Simulated Plasma Concentrations . . . . .                                                        | 23        |
| S.2.3. Simulated Non-Compartmental Analysis Parameters . . . . .                                        | 27        |
| S.2.3.1. Maximum Observed Concentration . . . . .                                                       | 27        |
| S.2.3.2. Time of Maximum Observed Concentration . . . . .                                               | 30        |
| S.2.3.3. Area Under the Concentration-Time Curve . . . . .                                              | 32        |

## S.1. Simulations Where Test Product Presents a Lower Bioavailability than the Reference Product

### S.1.1. Simulated Volume of Distribution

Table S1: Summary Statistics of Simulated Volume of Distribution, for Simulations where Test Product Presents a Lower Bioavailability than the Reference Product

|                   | True Bioequivalent             |                                | True Bioinequivalent           |                                |
|-------------------|--------------------------------|--------------------------------|--------------------------------|--------------------------------|
|                   | Reference                      | Test                           | Reference                      | Test                           |
| 30% IIV & 0% IOV  | 58.79 (30.7%)<br>[58.72–58.87] | 58.79 (30.7%)<br>[58.72–58.87] | 58.64 (30.5%)<br>[58.57–58.72] | 58.64 (30.5%)<br>[58.57–58.72] |
| 30% IIV & 10% IOV | 58.95 (32.2%)<br>[58.87–59.03] | 58.95 (32.2%)<br>[58.87–59.03] | 58.93 (32.4%)<br>[58.85–59.01] | 58.93 (32.4%)<br>[58.85–59.01] |
| 30% IIV & 20% IOV | 58.67 (37.1%)<br>[58.58–58.76] | 58.65 (37.2%)<br>[58.56–58.74] | 58.63 (37.6%)<br>[58.53–58.72] | 58.64 (37.6%)<br>[58.55–58.74] |
| 30% IIV & 30% IOV | 58.71 (44.4%)<br>[58.6–58.82]  | 58.76 (44.3%)<br>[58.66–58.87] | 58.85 (44.1%)<br>[58.74–58.95] | 58.88 (44%)<br>[58.77–58.98]   |
| 30% IIV & 40% IOV | 58.83 (53.4%)<br>[58.71–58.96] | 58.81 (53.2%)<br>[58.68–58.93] | 58.86 (53.1%)<br>[58.73–58.98] | 58.77 (52.9%)<br>[58.65–58.9]  |
| 30% IIV & 50% IOV | 58.93 (63.1%)<br>[58.78–59.07] | 59.11 (63.4%)<br>[58.96–59.26] | 58.77 (63.5%)<br>[58.63–58.92] | 58.73 (63.5%)<br>[58.59–58.88] |
| 30% IIV & 60% IOV | 58.2 (75.3%)<br>[58.04–58.37]  | 58.5 (75.8%)<br>[58.34–58.67]  | 58.67 (75%)<br>[58.5–58.84]    | 58.77 (74.8%)<br>[58.6–58.93]  |

Values for Volume of Distribution (V) are in liters (L), and are presented as geometric mean ( $G_{\text{mean}}$ ), with geometric coefficient of variation (GCV%) within parenthesis, and 95% confidence interval (CI) of the  $G_{\text{mean}}$  within square brackets.

$N = 210000$  for each group.

IIV – Inter-individual variability; IOV – Inter-occasion variability.

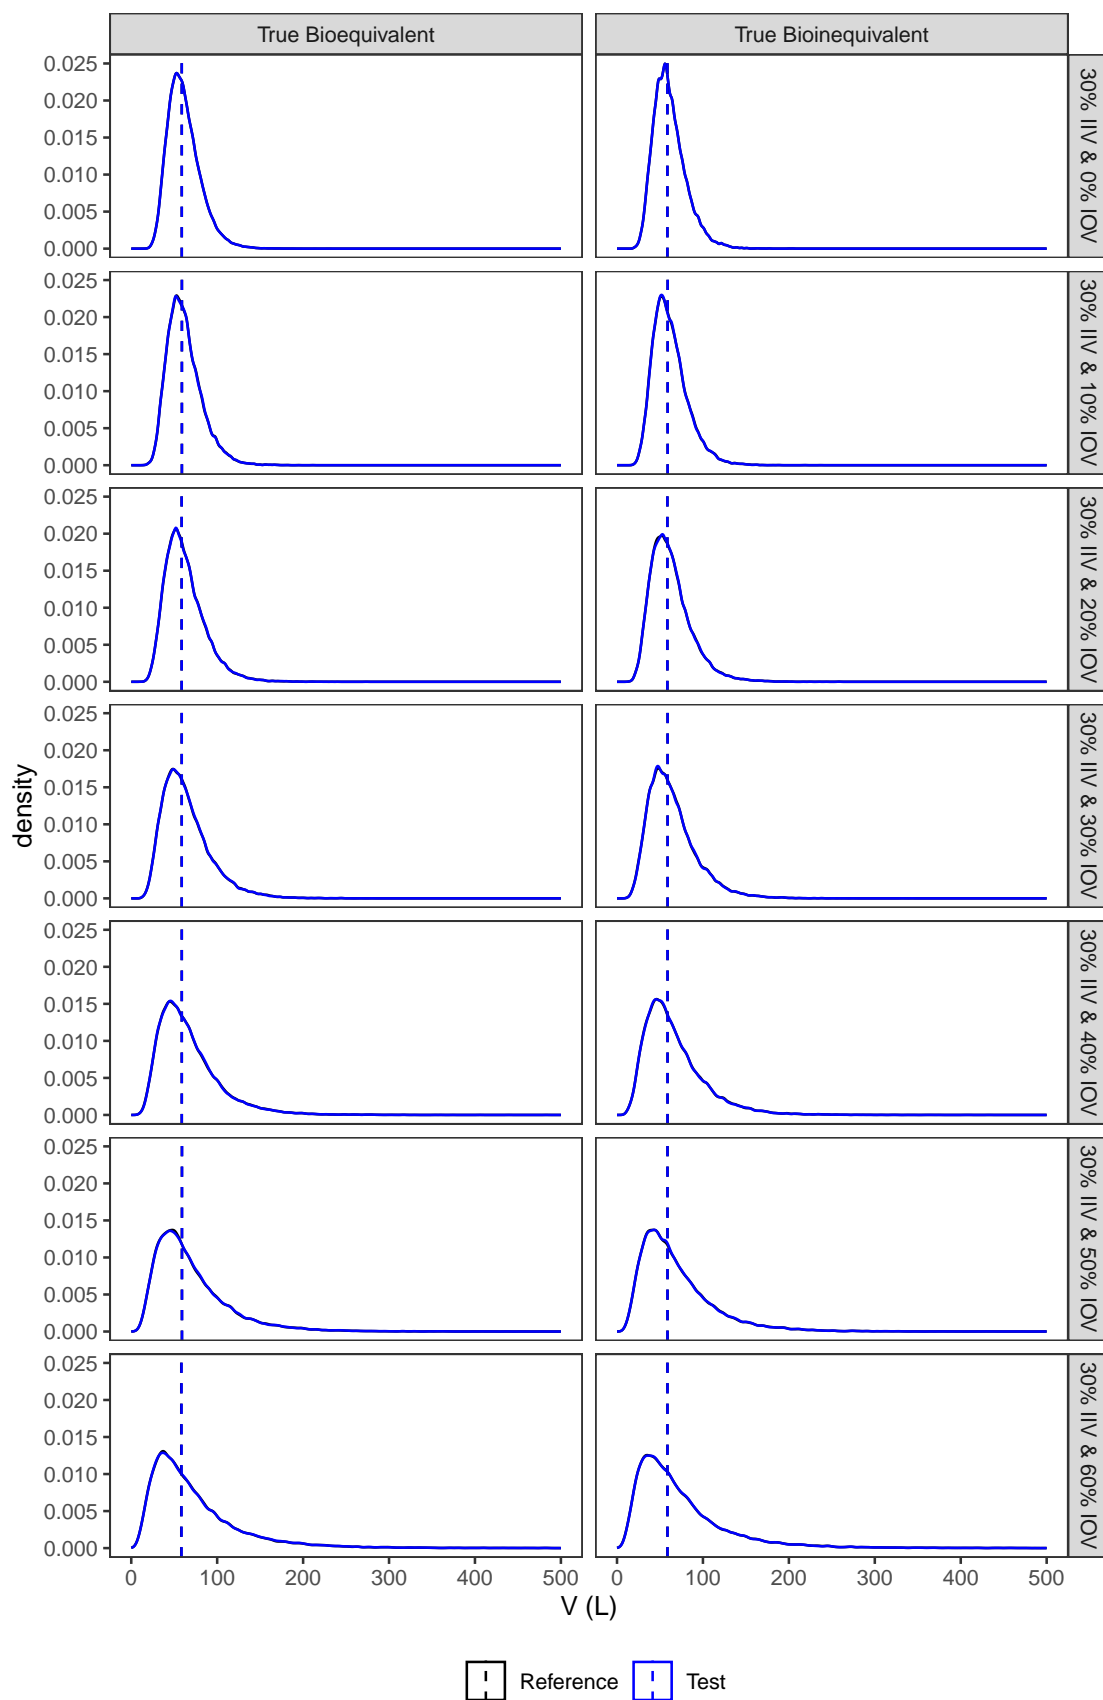

Figure S1: Distribution of Simulated Volume of Distribution, for Simulations where Test Product Presents a Lower Bioavailability than the Reference Product

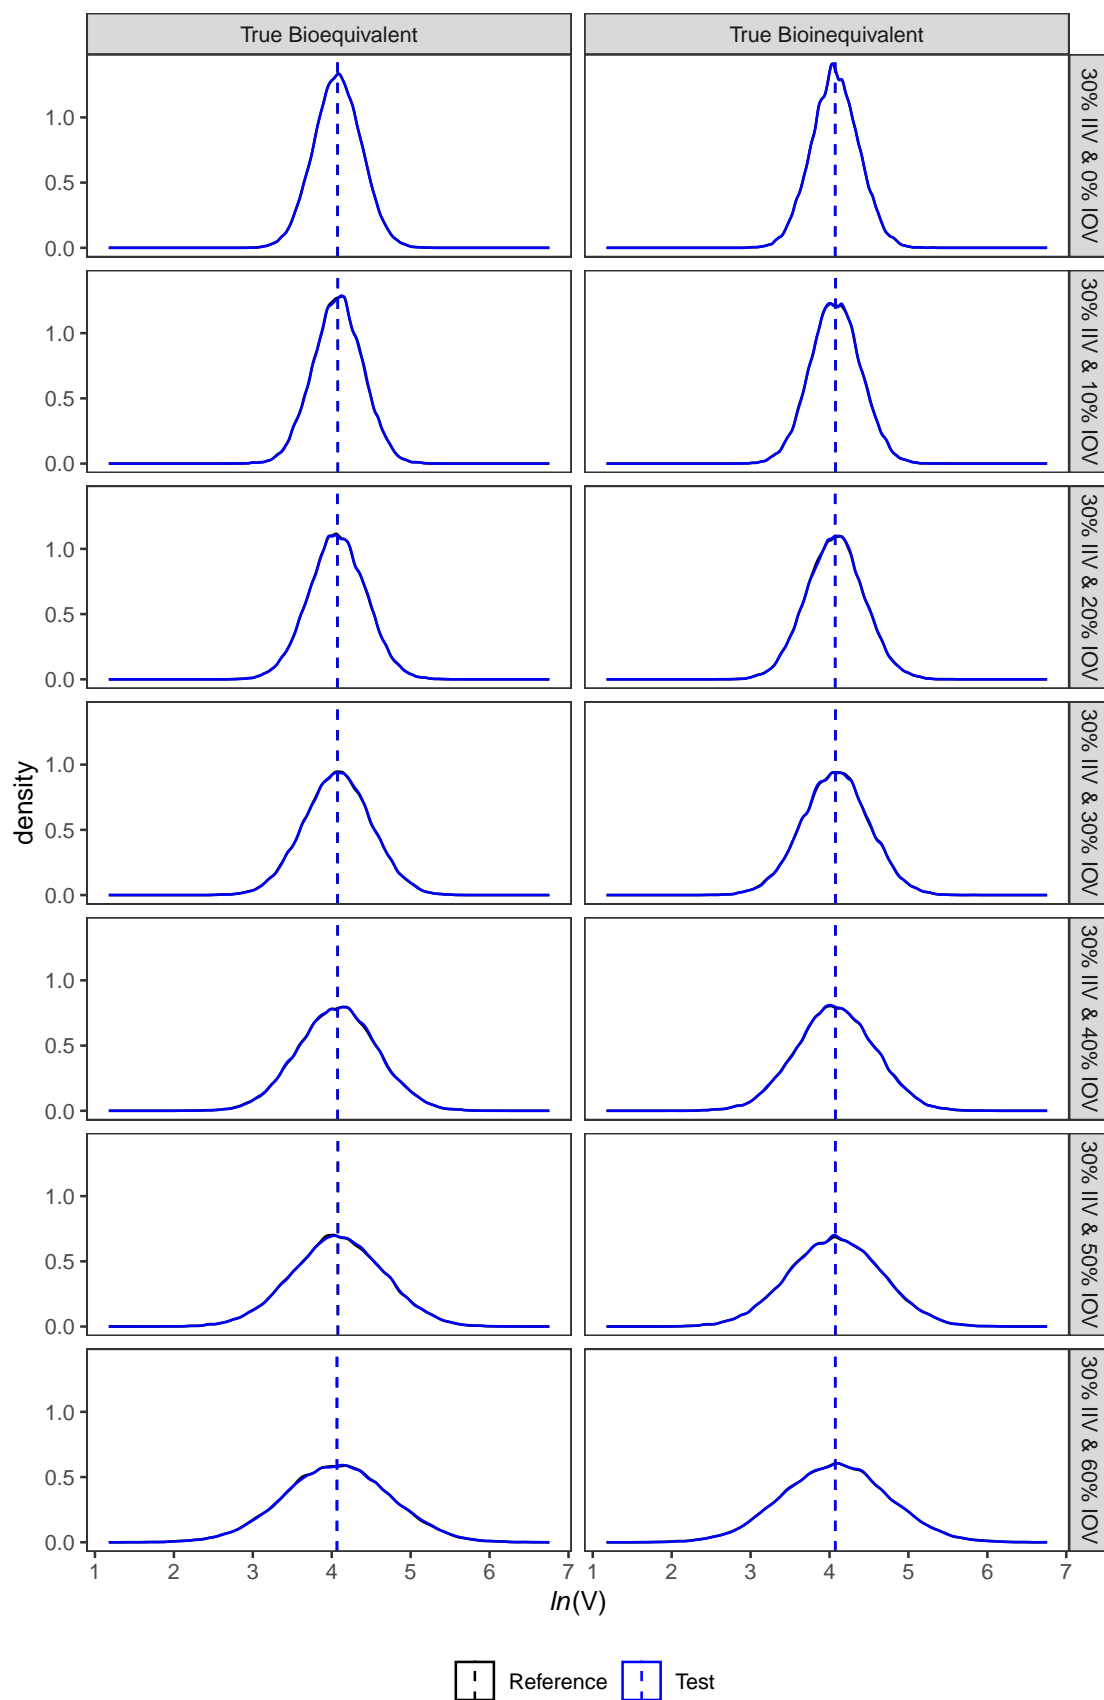

Figure S2: Distribution of  $\ln$ -Transformed Simulated Volume of Distribution, for Simulations where Test Product Presents a Lower Bioavailability than the Reference Product



### S.1.2. Simulated Plasma Concentrations

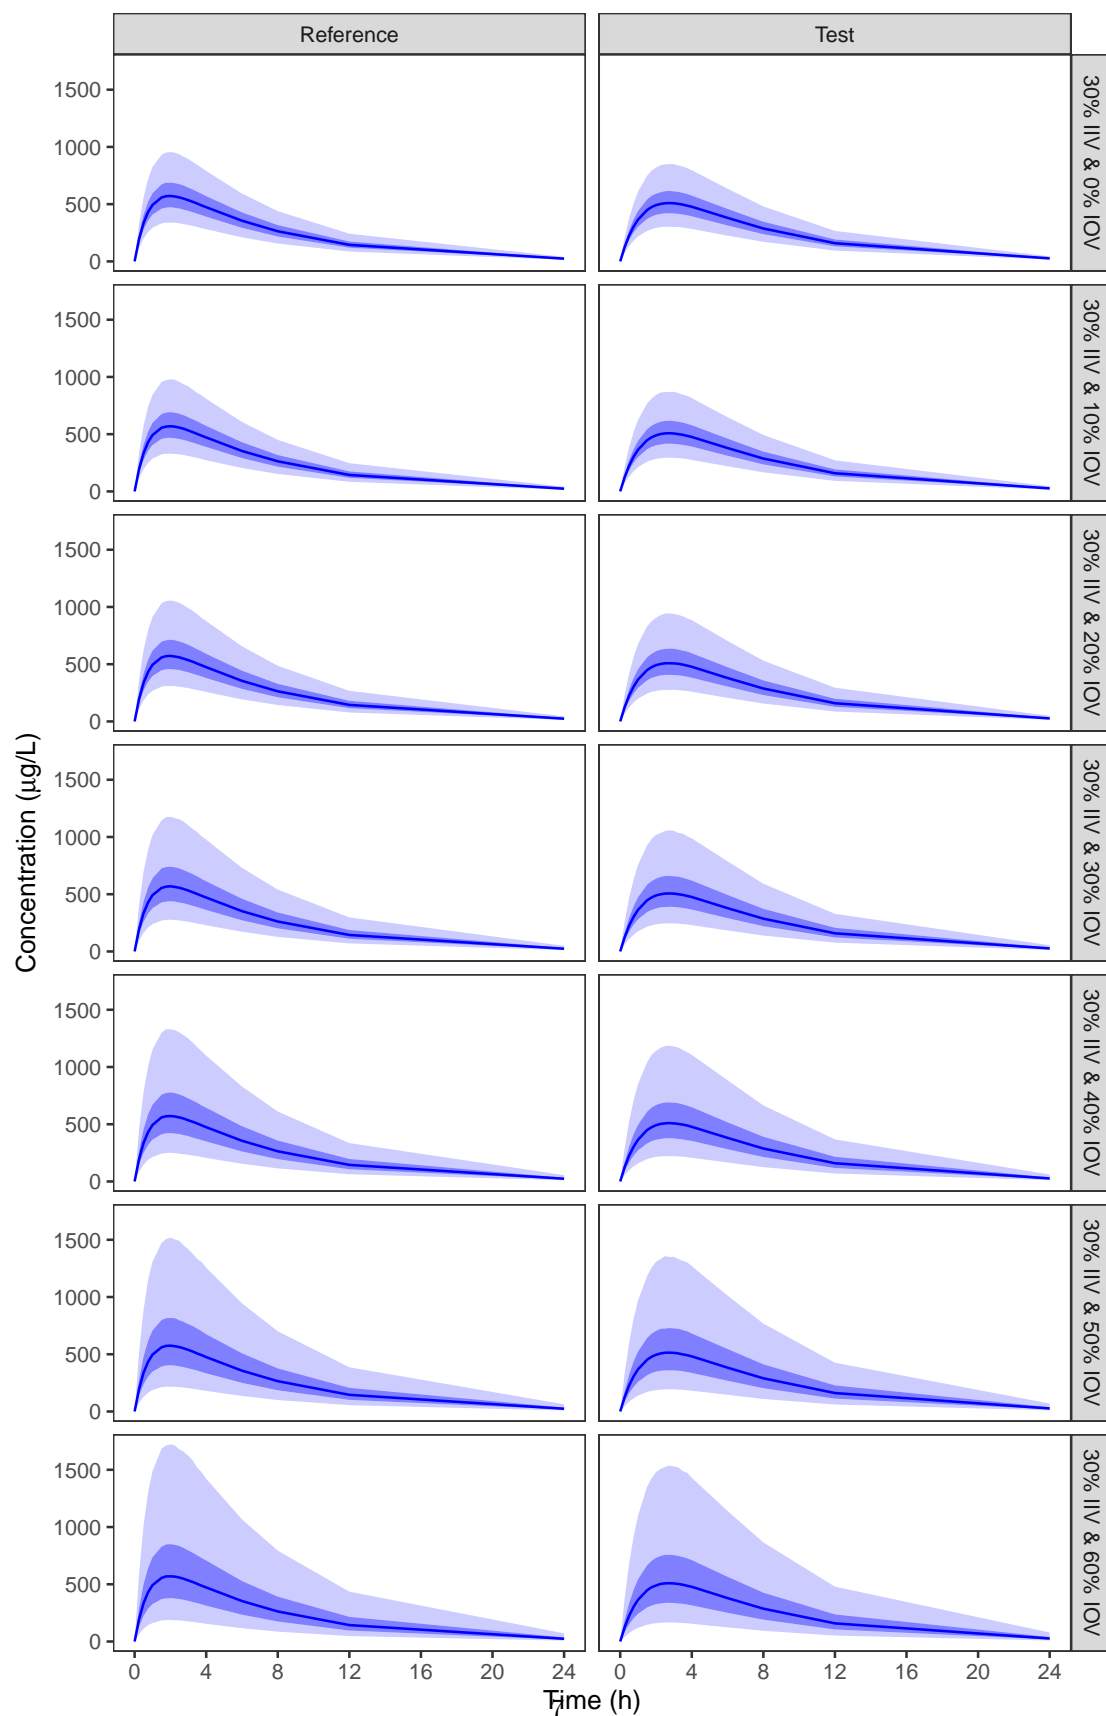

Figure S3: 90% Confidence Interval of Simulated Concentration-Time Data, for True Bioequivalent Simulations where Test Product Presents a Lower Bioavailability than the Reference Product – Linear Scale

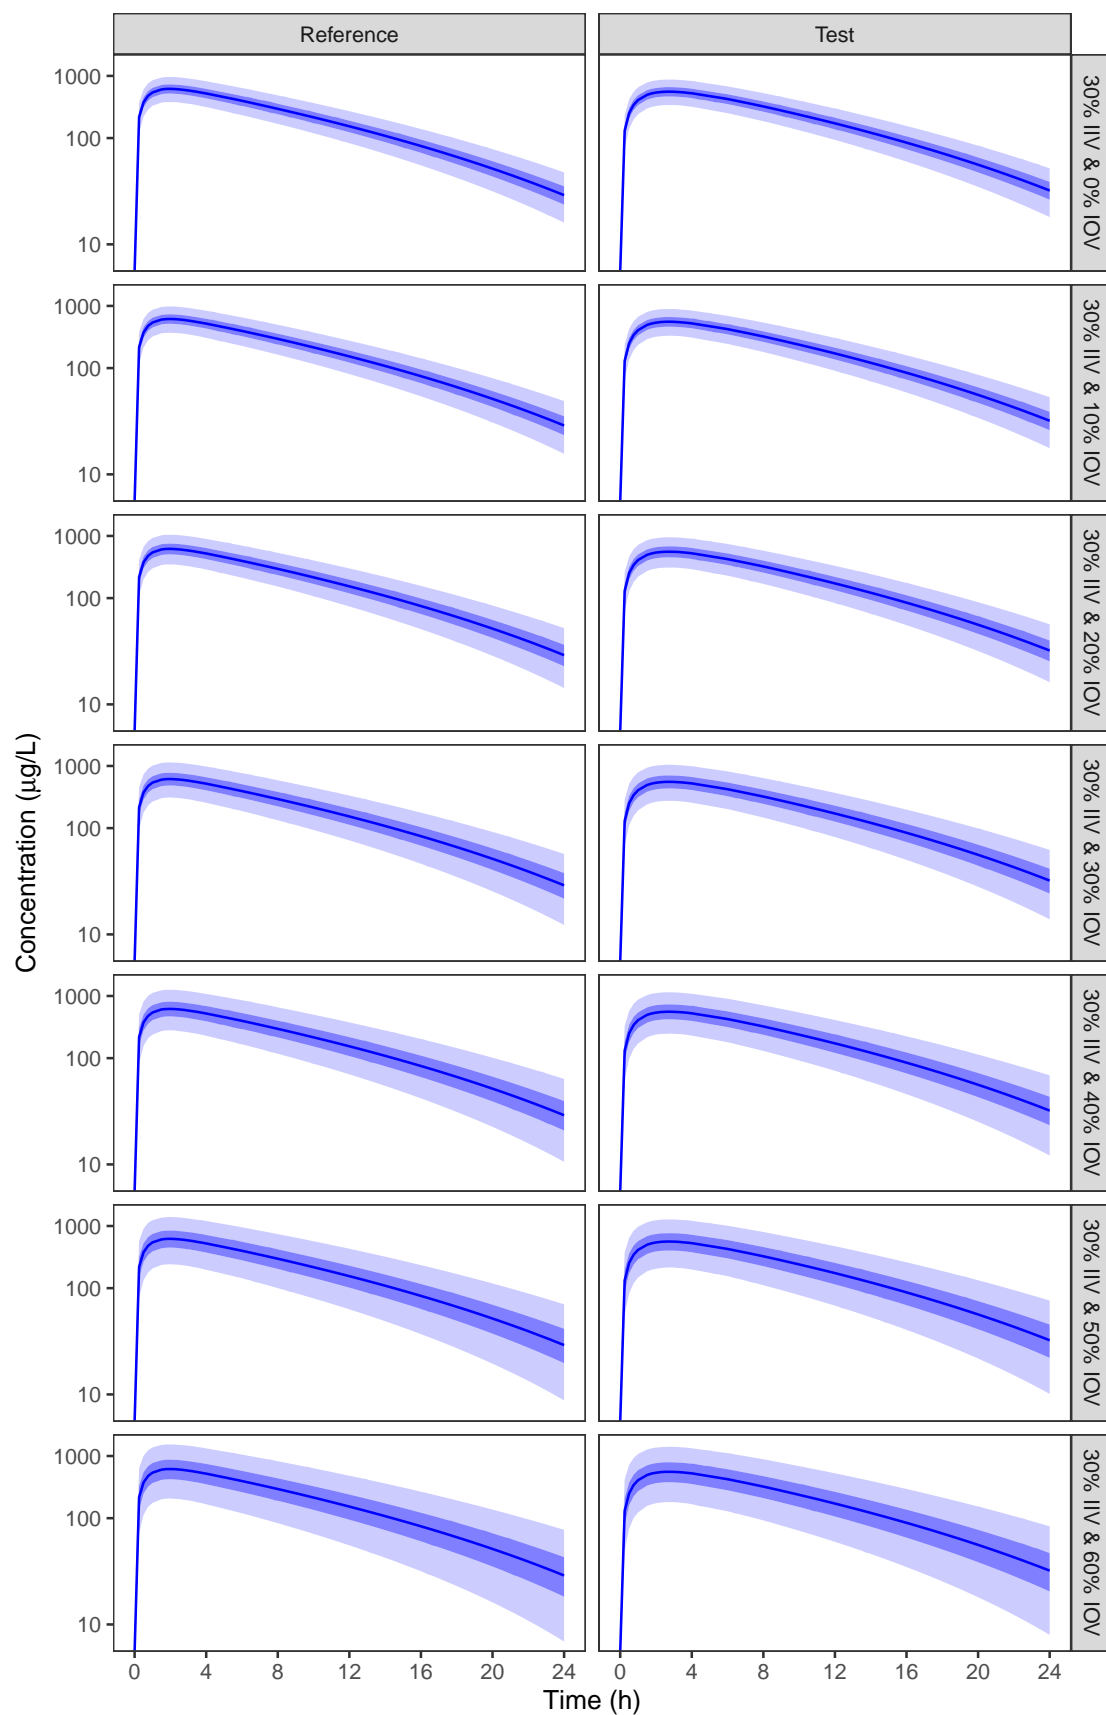

Figure S4: 90% Confidence Interval of Simulated Concentration-Time Data, for True Bioequivalent Simulations where Test Product Presents a Lower Bioavailability than the Reference Product – Semi-Logarithmic Scale

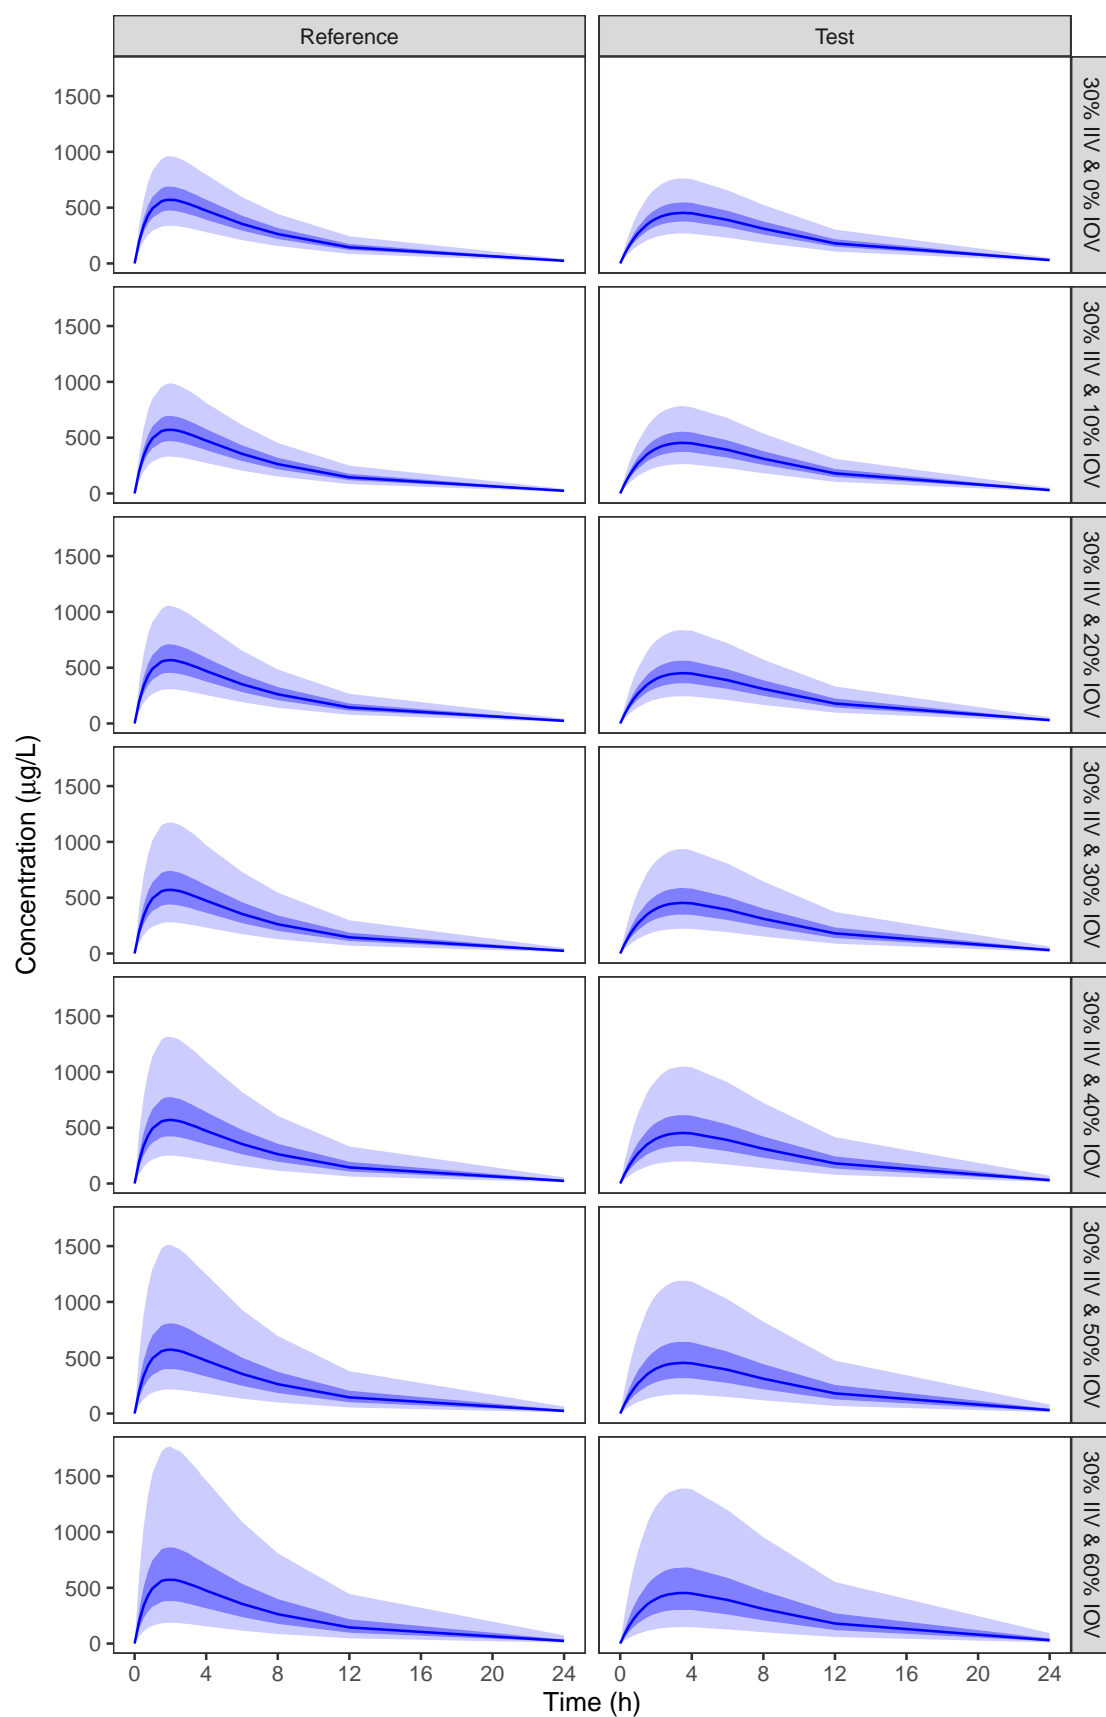

Figure S5: 90% Confidence Interval of Simulated Concentration-Time Data, for True Bioequivalent Simulations where Test Product Presents a Lower Bioavailability than the Reference Product – Linear Scale

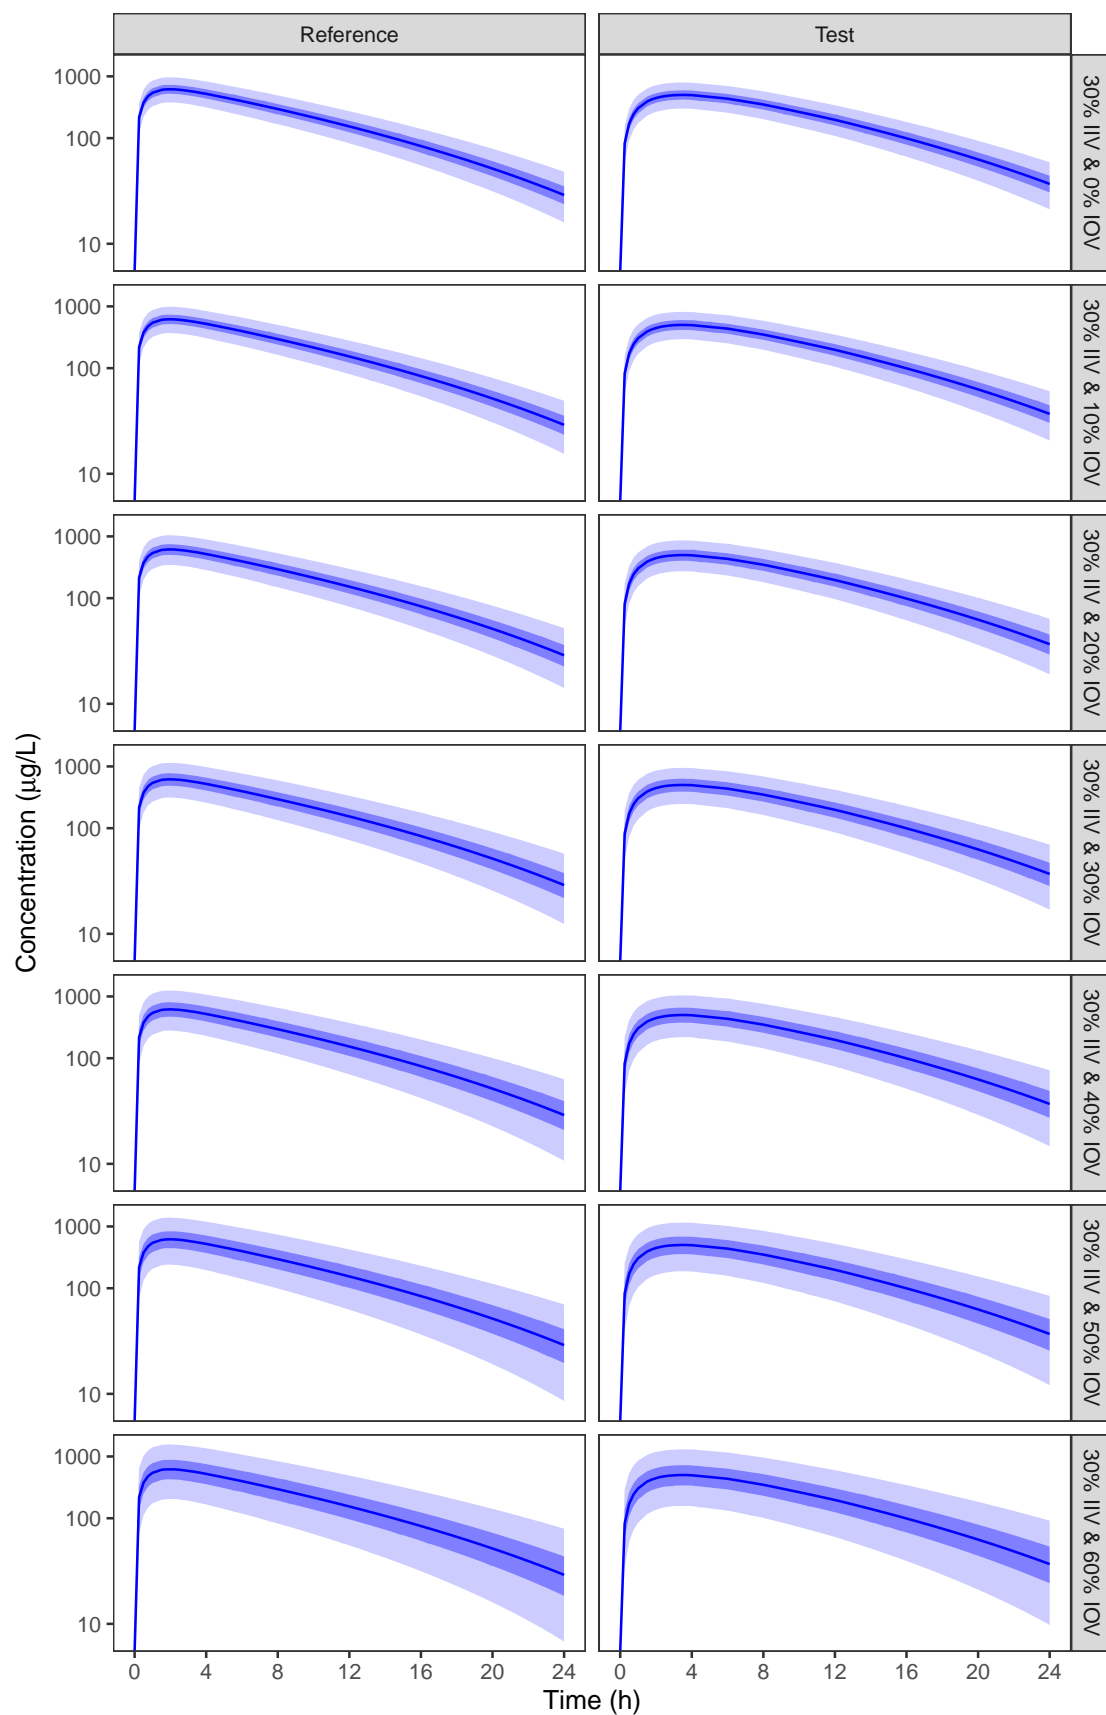

Figure S6: 90% Confidence Interval of Simulated Concentration-Time Data, for True Bioequivalent Simulations where Test Product Presents a Lower Bioavailability than the Reference Product – Semi-Logarithmic Scale

### S.1.3. Simulated Non-Compartmental Analysis Parameters

#### S.1.3.1. Maximum Observed Concentration

Table S2: Summary Statistics of Simulated C<sub>max</sub>, for Simulations where Test Product Presents a Lower Bioavailability than the Reference Product

|                   | True Bioequivalent                |                                   | True Bioinequivalent              |                                   |
|-------------------|-----------------------------------|-----------------------------------|-----------------------------------|-----------------------------------|
|                   | Reference                         | Test                              | Reference                         | Test                              |
| 30% IIV & 0% IOV  | 642.57 (31.4%)<br>[641.73–643.41] | 580.24 (31.3%)<br>[579.48–581]    | 643.6 (31.1%)<br>[642.76–644.44]  | 514.58 (31.2%)<br>[513.91–515.25] |
| 30% IIV & 10% IOV | 640.65 (32.9%)<br>[639.78–641.53] | 578.51 (32.9%)<br>[577.72–579.3]  | 640.92 (33%)<br>[640.03–641.8]    | 512.06 (33%)<br>[511.36–512.77]   |
| 30% IIV & 20% IOV | 643.95 (37.7%)<br>[642.94–644.95] | 581.93 (37.7%)<br>[581.03–582.84] | 643.91 (38.2%)<br>[642.9–644.93]  | 514.8 (38.1%)<br>[513.99–515.61]  |
| 30% IIV & 30% IOV | 643.26 (44.8%)<br>[642.08–644.43] | 580.42 (44.9%)<br>[579.36–581.48] | 642 (44.6%)<br>[640.83–643.17]    | 512.7 (44.5%)<br>[511.77–513.64]  |
| 30% IIV & 40% IOV | 642.05 (53.8%)<br>[640.67–643.44] | 579.77 (53.6%)<br>[578.53–581.02] | 641.45 (53.6%)<br>[640.07–642.83] | 513.71 (53.5%)<br>[512.6–514.81]  |
| 30% IIV & 50% IOV | 640.86 (63.5%)<br>[639.27–642.46] | 576.84 (63.7%)<br>[575.4–578.28]  | 642.08 (64%)<br>[640.48–643.69]   | 513.91 (63.9%)<br>[512.63–515.2]  |
| 30% IIV & 60% IOV | 648.75 (75.8%)<br>[646.88–650.62] | 582.9 (76.1%)<br>[581.22–584.59]  | 643.82 (75.5%)<br>[641.98–645.67] | 514.29 (75.2%)<br>[512.82–515.76] |

Values for Maximum Observed Concentration (C<sub>max</sub>) are in  $\mu\text{g/L}$ , and are presented as G<sub>mean</sub>, with GCV% within parenthesis, and 95% CI of the G<sub>mean</sub> within square brackets.

$N = 210000$  for each group.

IIV – Inter-individual variability; IOV – Inter-occasion variability.

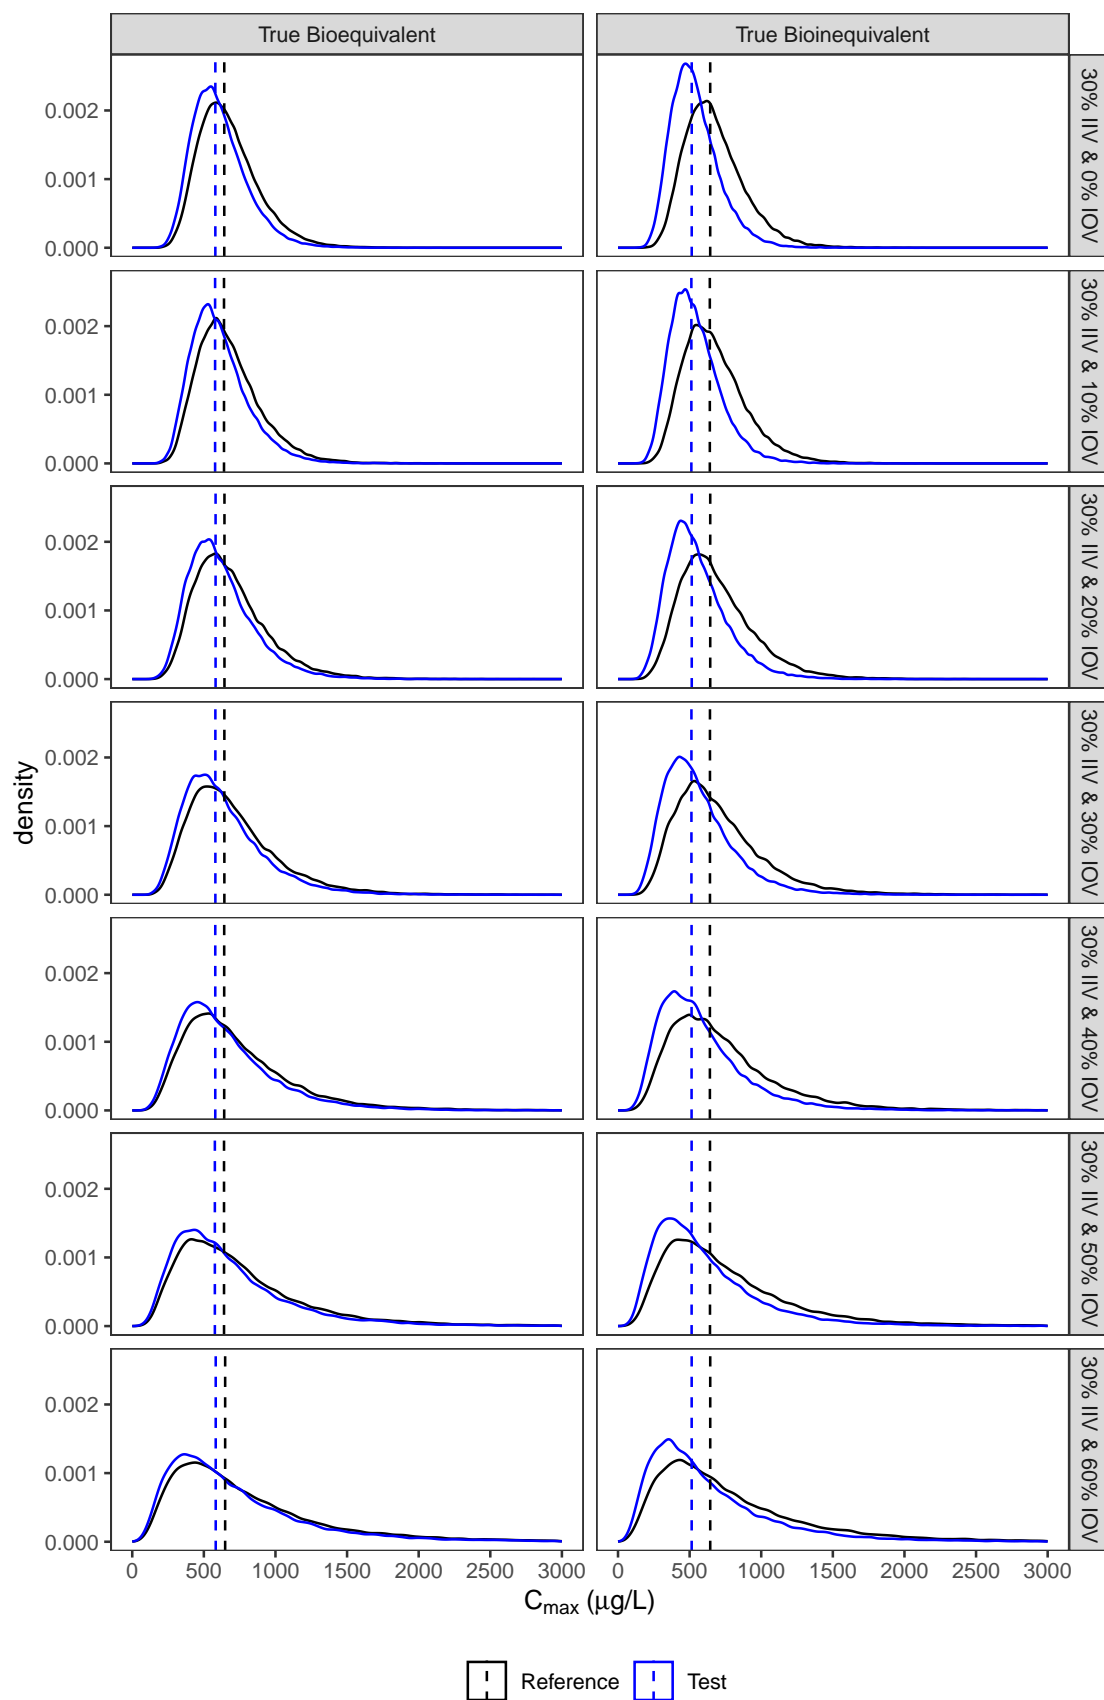

Figure S7: Distribution of Observed  $C_{max}$ , for Simulations where Test Product Presents a Lower Bioavailability than the Reference Product

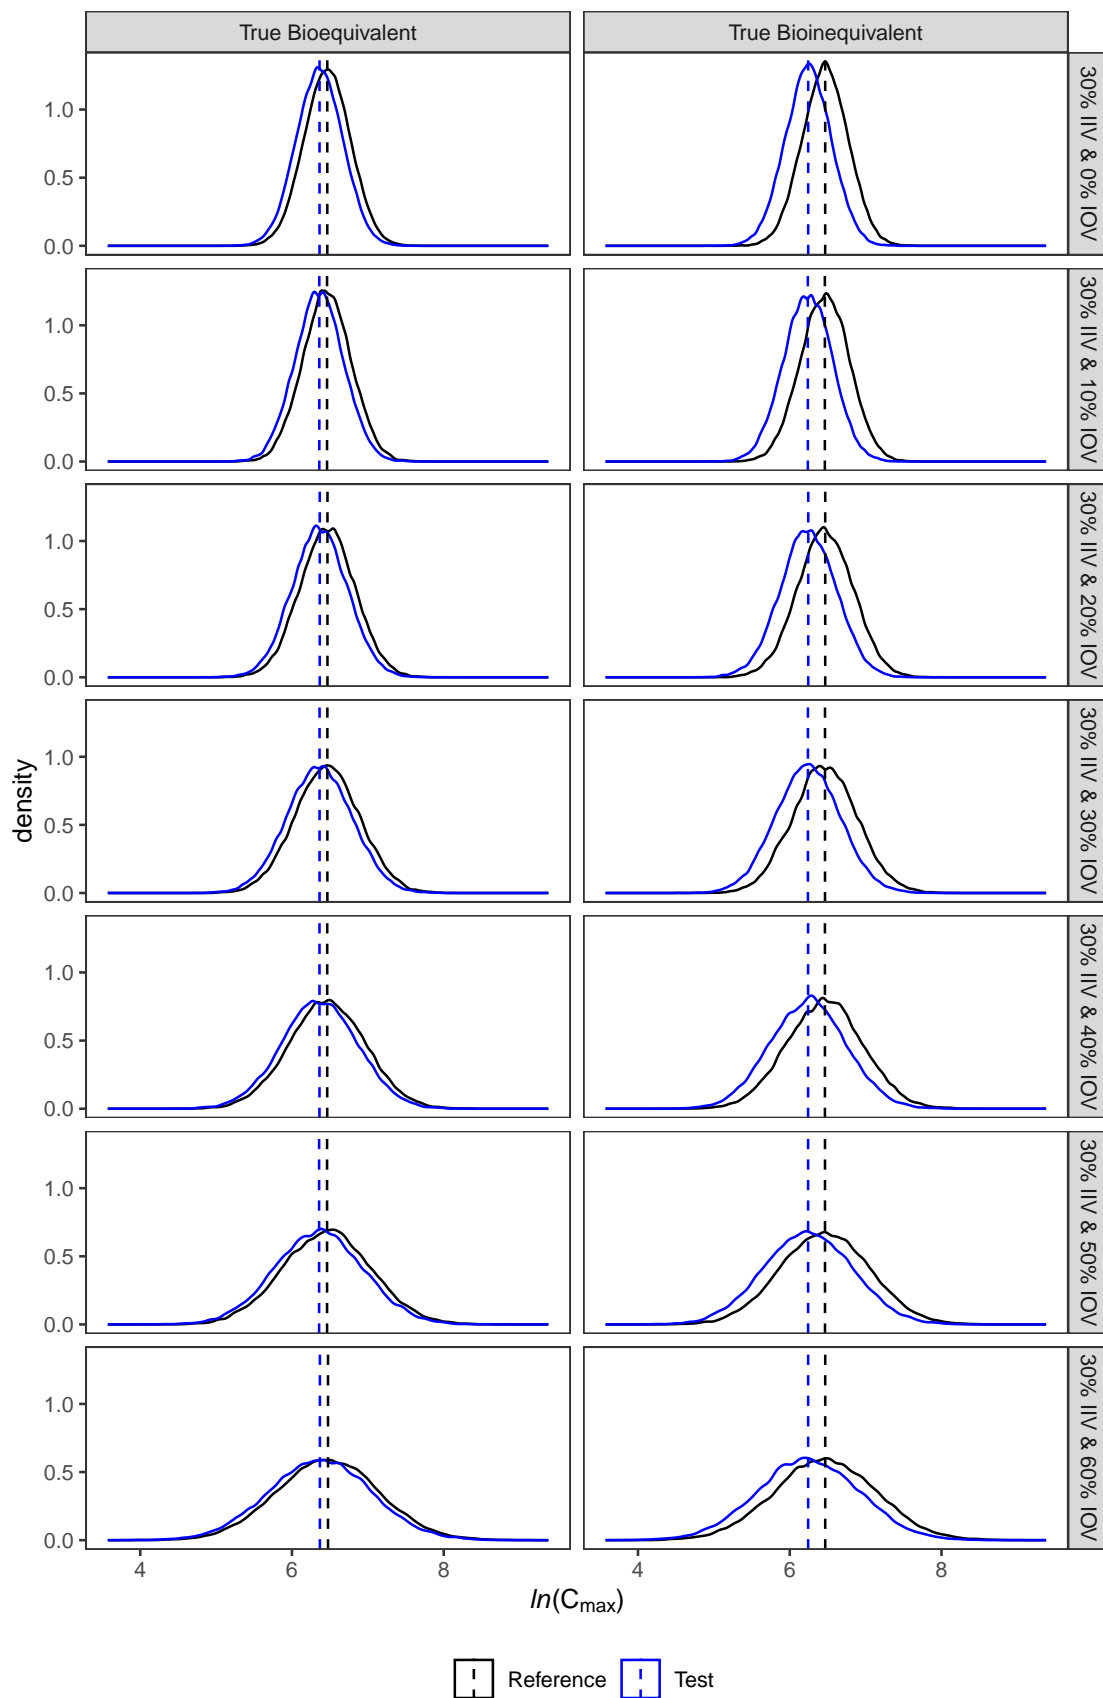

Figure S8: Distribution of  $\ln$ -Transformed Observed  $C_{\max}$ , for Simulations where Test Product Presents a Lower Bioavailability than the Reference Product

### S.1.3.2. Time of Maximum Observed Concentration

Table S3: Summary Statistics of Simulated C<sub>max</sub>, for Simulations where Test Product Presents a Lower Bioavailability than the Reference Product

|                   | True Bioequivalent |              | True Bioinequivalent |              |
|-------------------|--------------------|--------------|----------------------|--------------|
|                   | Reference          | Test         | Reference            | Test         |
| 30% IIV & 0% IOV  | 2.25 (0.75–4)      | 2.75 (1–6)   | 2.25 (0.75–4)        | 3.25 (1.5–6) |
| 30% IIV & 10% IOV | 2.25 (0.75–4)      | 2.75 (1.5–6) | 2.25 (0.75–4)        | 3.25 (1.5–8) |
| 30% IIV & 20% IOV | 2.25 (0.75–4)      | 2.75 (1–6)   | 2.25 (0.75–4)        | 3.25 (1.5–8) |
| 30% IIV & 30% IOV | 2.25 (0.75–4)      | 2.75 (1–6)   | 2.25 (0.75–4)        | 3.25 (1.5–6) |
| 30% IIV & 40% IOV | 2.25 (0.75–4)      | 2.75 (1–6)   | 2.25 (0.75–4)        | 3.25 (1.5–6) |
| 30% IIV & 50% IOV | 2.25 (0.75–4)      | 2.75 (1–6)   | 2.25 (0.75–4)        | 3.25 (1.5–8) |
| 30% IIV & 60% IOV | 2.25 (0.75–4)      | 2.75 (1.5–6) | 2.25 (0.75–4)        | 3.25 (1.5–8) |

Values for Time of Maximum Observed Concentration ( $t_{\max}$ ) are in hours (h), and are presented as median with range within parenthesis.

$N = 210000$  for each group.

IIV – Inter-individual variability; IOV – Inter-occasion variability.

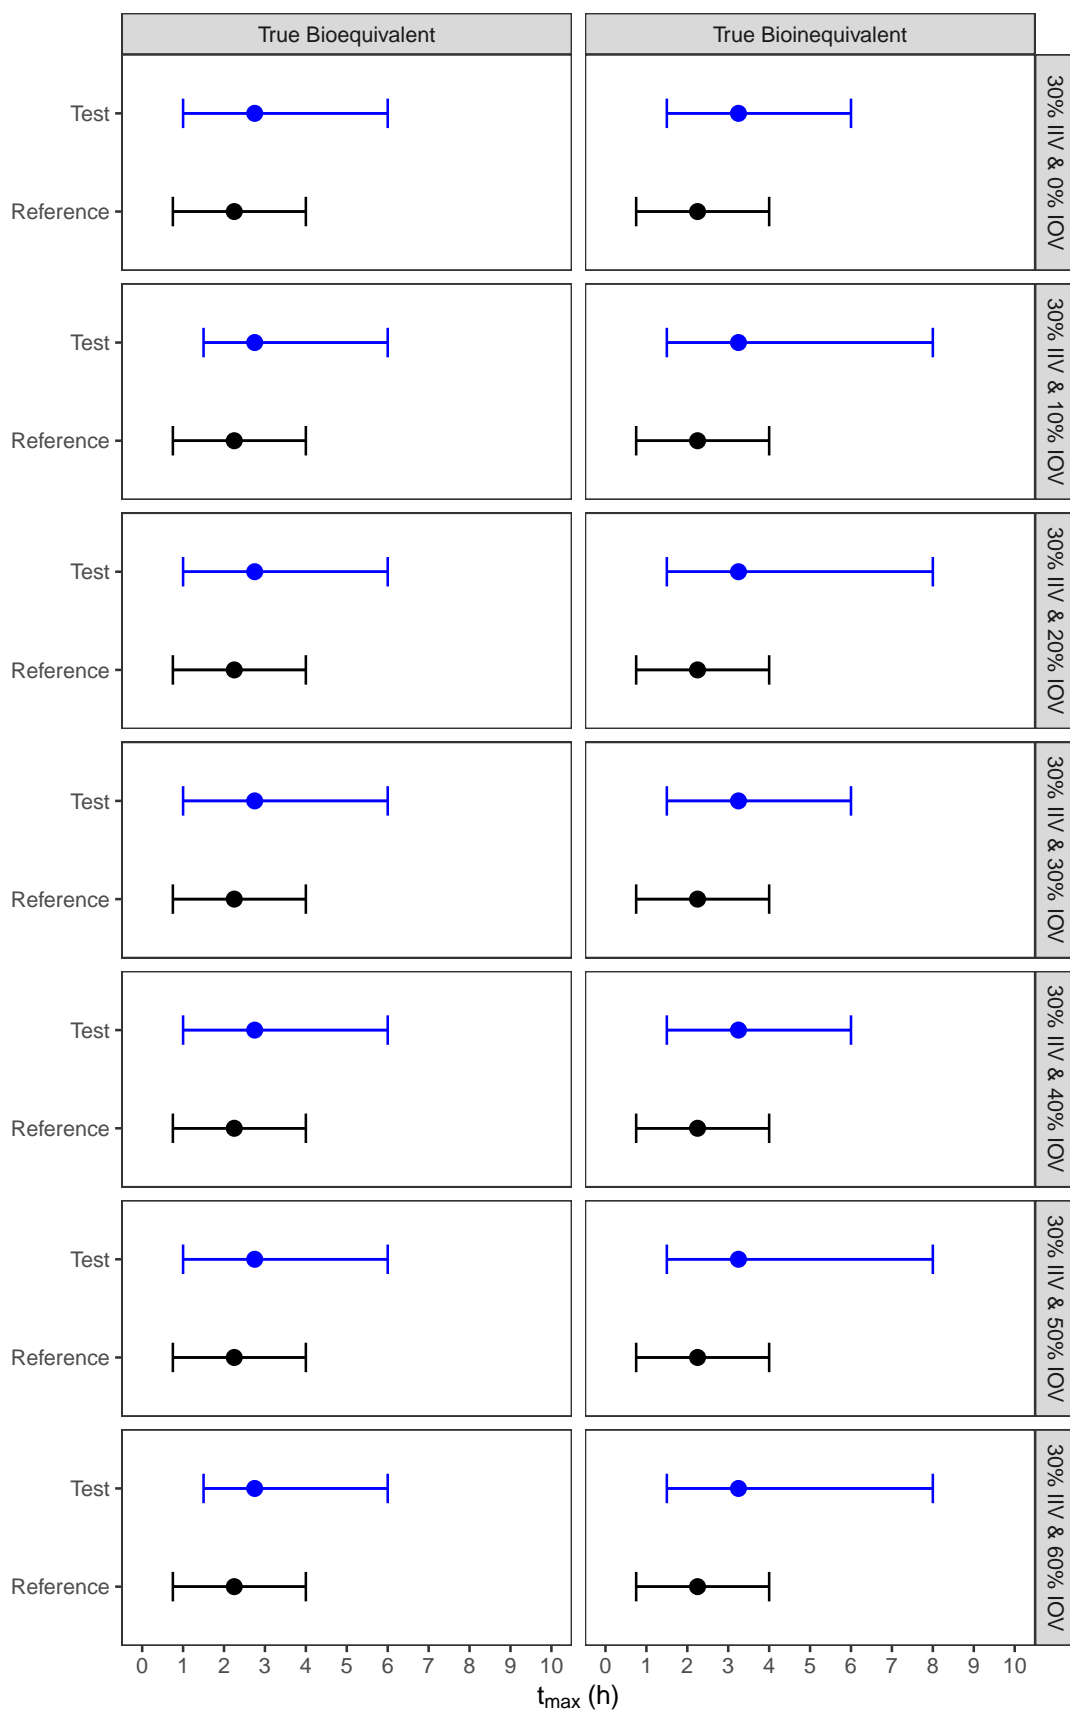

Figure S9: Distribution of Observed  $T_{max}$ , for Simulations where Test Product Presents a Lower Bioavailability than the Reference Product

### S.1.3.3. Area Under the Concentration-Time Curve

Table S4: Summary Statistics of Simulated AUC<sub>0-t</sub>, for Simulations where Test Product Presents a Lower Bioavailability than the Reference Product

|                   | True Bioequivalent                   |                                      | True Bioinequivalent                 |                                      |
|-------------------|--------------------------------------|--------------------------------------|--------------------------------------|--------------------------------------|
|                   | Reference                            | Test                                 | Reference                            | Test                                 |
| 30% IIV & 0% IOV  | 4951.25 (30.9%)<br>[4944.86–4957.64] | 4930.23 (30.9%)<br>[4923.87–4936.6]  | 4961.11 (30.7%)<br>[4954.75–4967.47] | 4900.51 (30.7%)<br>[4894.21–4906.81] |
| 30% IIV & 10% IOV | 4938.51 (32.3%)<br>[4931.85–4945.18] | 4917.09 (32.4%)<br>[4910.46–4923.74] | 4938.43 (32.6%)<br>[4931.73–4945.14] | 4877.68 (32.6%)<br>[4871.06–4884.3]  |
| 30% IIV & 20% IOV | 4961.11 (37.3%)<br>[4953.46–4968.78] | 4941.01 (37.4%)<br>[4933.38–4948.66] | 4965.32 (37.8%)<br>[4957.56–4973.08] | 4903.31 (37.8%)<br>[4895.66–4910.98] |
| 30% IIV & 30% IOV | 4958.66 (44.5%)<br>[4949.65–4967.69] | 4932.36 (44.5%)<br>[4923.41–4941.33] | 4947.19 (44.3%)<br>[4938.25–4956.15] | 4883.78 (44.2%)<br>[4874.96–4892.61] |
| 30% IIV & 40% IOV | 4947.1 (53.5%)<br>[4936.5–4957.73]   | 4927.58 (53.3%)<br>[4917.05–4938.13] | 4946.54 (53.3%)<br>[4935.98–4957.13] | 4892.73 (53.1%)<br>[4882.32–4903.17] |
| 30% IIV & 50% IOV | 4939.95 (63.2%)<br>[4927.72–4952.21] | 4903.76 (63.5%)<br>[4891.57–4915.98] | 4951.22 (63.6%)<br>[4938.88–4963.58] | 4893.86 (63.6%)<br>[4881.67–4906.08] |
| 30% IIV & 60% IOV | 5001.7 (75.4%)<br>[4987.36–5016.08]  | 4954.46 (75.9%)<br>[4940.19–4968.78] | 4963.79 (75.2%)<br>[4949.6–4978.02]  | 4895.88 (74.9%)<br>[4881.92–4909.87] |

Values for Area Under the Concentration-Time Curve (AUC<sub>0-t</sub>) are in  $\mu\text{g}\cdot\text{h}/\text{L}$ , and are presented as  $G_{\text{mean}}$ , with GCV% within parenthesis, and 95% CI of the  $G_{\text{mean}}$  within square brackets.

$N = 210000$  for each group.

IIV – Inter-individual variability; IOV – Inter-occasion variability.

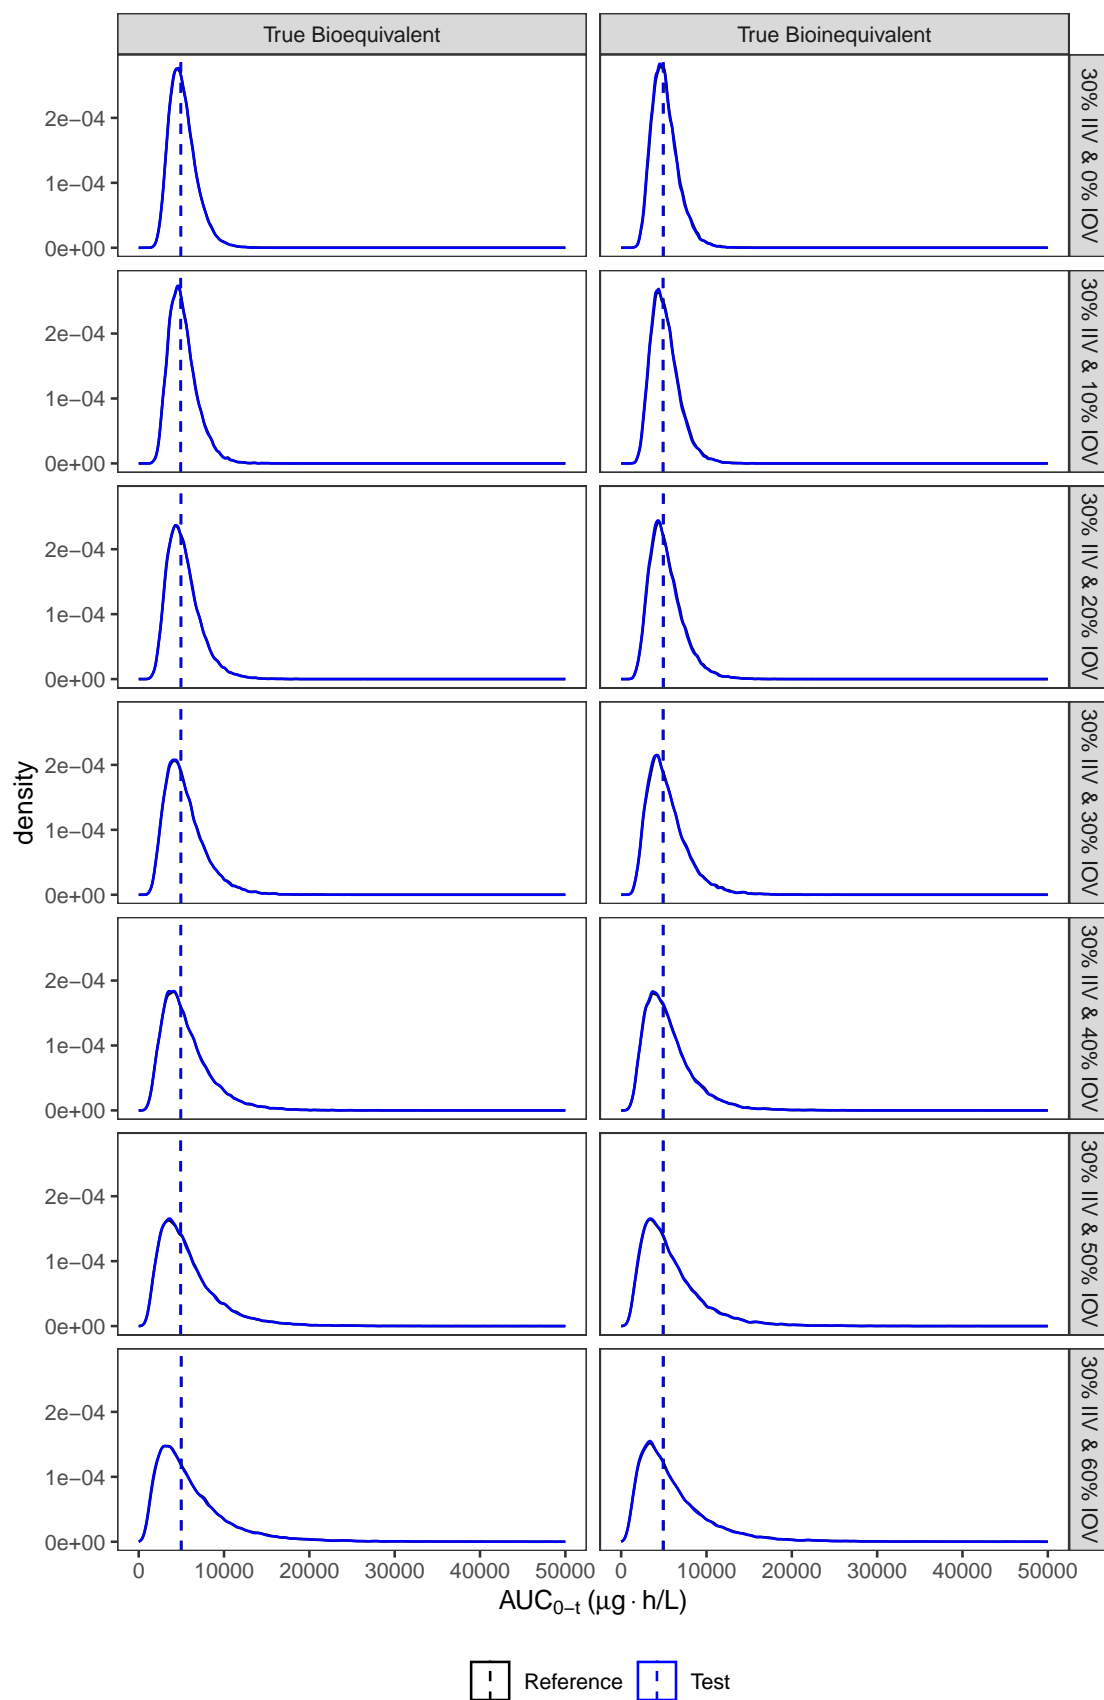

Figure S10: Distribution of Observed  $AUC_{0-t}$ , for Simulations where Test Product Presents a Lower Bioavailability than the Reference Product

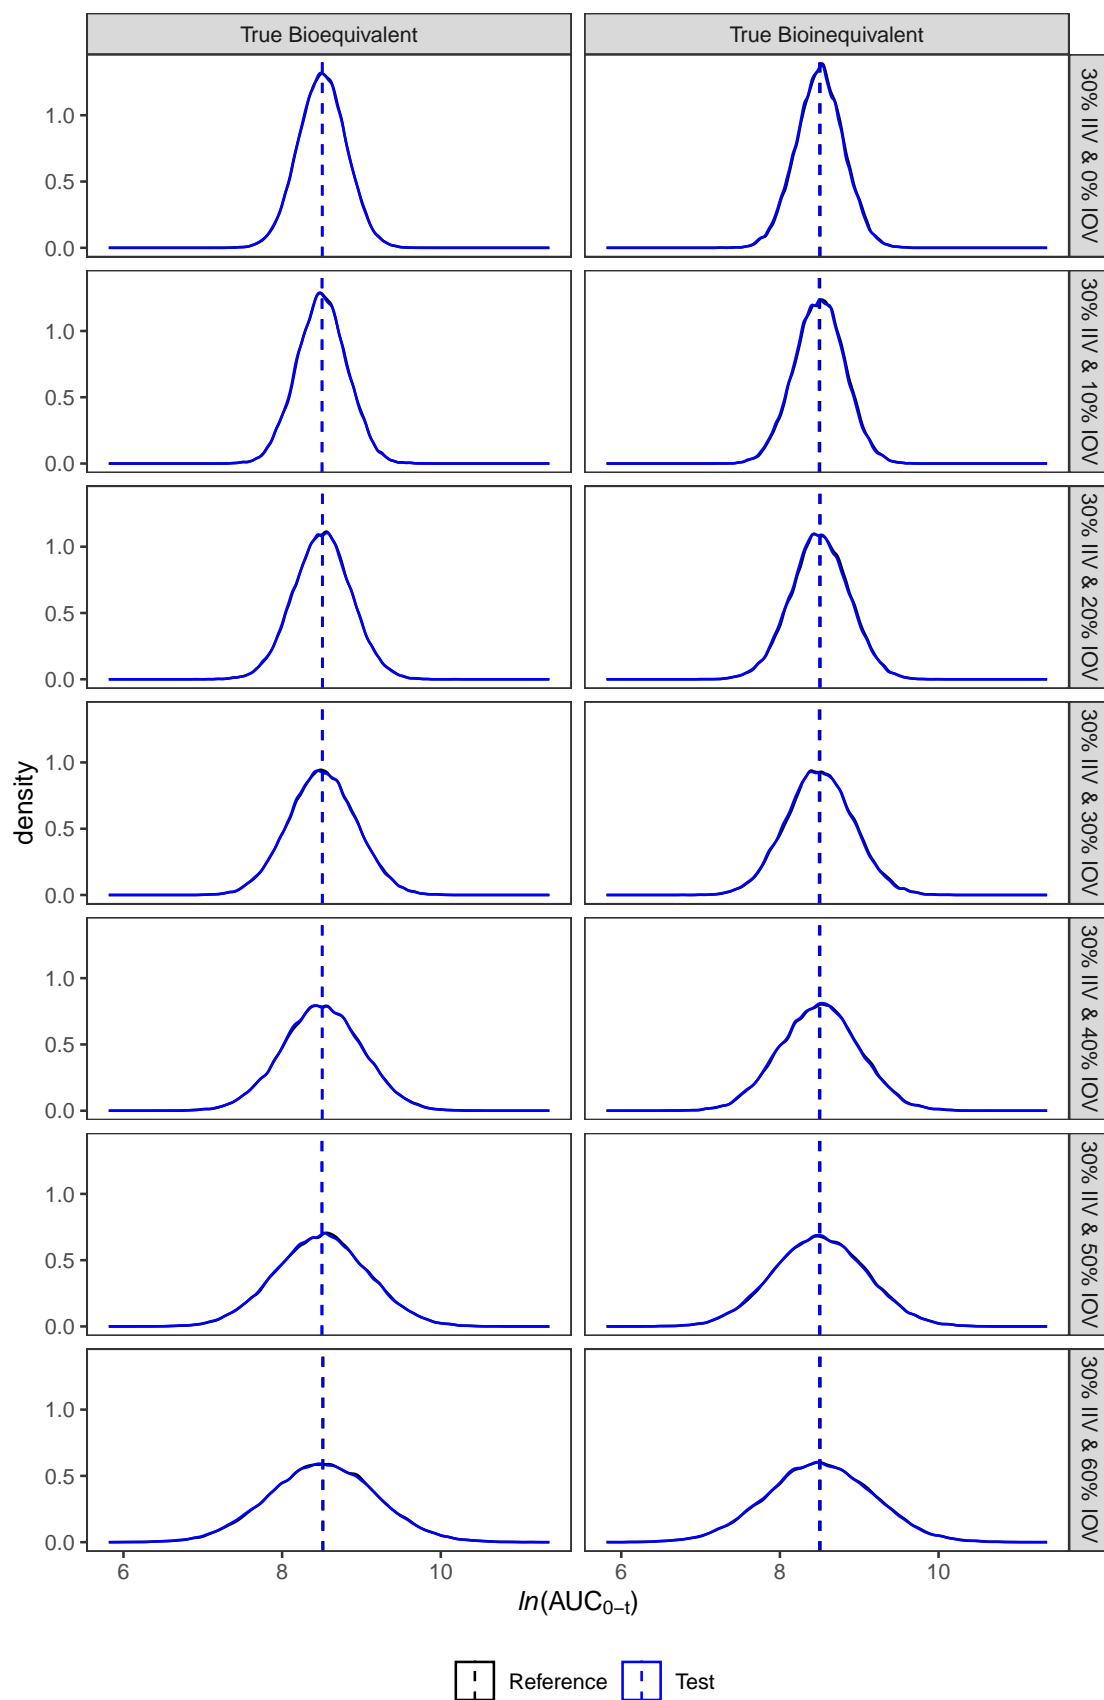

Figure S11: Distribution of  $\ln$ -Transformed Observed  $\text{AUC}_{0-t}$ , for Simulations where Test Product Presents a Lower Bioavailability than the Reference Product <sup>18</sup>

## S.2. Simulations Where Test Product Presents a Higher Bioavailability than the Reference Product

### S.2.1. Simulated Volume of Distribution

Table S5: Summary Statistics of Simulated Volume of Distribution, for Simulations where Test Product Presents a Higher Bioavailability than the Reference Product

|                   | True Bioequivalent             |                                | True Bioinequivalent           |                                |
|-------------------|--------------------------------|--------------------------------|--------------------------------|--------------------------------|
|                   | Reference                      | Test                           | Reference                      | Test                           |
| 30% IIV & 0% IOV  | 58.85 (30.6%)<br>[58.77–58.92] | 58.85 (30.6%)<br>[58.77–58.92] | 58.78 (30.9%)<br>[58.7–58.86]  | 58.78 (30.9%)<br>[58.7–58.86]  |
| 30% IIV & 10% IOV | 58.96 (32.2%)<br>[58.88–59.04] | 58.95 (32.2%)<br>[58.87–59.03] | 58.73 (32.6%)<br>[58.65–58.81] | 58.74 (32.5%)<br>[58.66–58.82] |
| 30% IIV & 20% IOV | 58.71 (37.1%)<br>[58.62–58.8]  | 58.66 (37.1%)<br>[58.57–58.75] | 59.06 (37.4%)<br>[58.97–59.15] | 59.08 (37.4%)<br>[58.99–59.17] |
| 30% IIV & 30% IOV | 58.9 (45%)<br>[58.79–59.01]    | 58.89 (44.8%)<br>[58.78–58.99] | 58.73 (44.5%)<br>[58.62–58.84] | 58.77 (44.5%)<br>[58.66–58.88] |
| 30% IIV & 40% IOV | 58.56 (53.1%)<br>[58.44–58.69] | 58.54 (53.2%)<br>[58.42–58.67] | 58.62 (53.1%)<br>[58.5–58.75]  | 58.68 (53%)<br>[58.56–58.81]   |
| 30% IIV & 50% IOV | 58.32 (63.4%)<br>[58.17–58.46] | 58.42 (63.5%)<br>[58.27–58.56] | 58.81 (63.5%)<br>[58.66–58.96] | 58.91 (63.5%)<br>[58.77–59.06] |
| 30% IIV & 60% IOV | 59.13 (75.1%)<br>[58.96–59.3]  | 59.05 (75.1%)<br>[58.88–59.22] | 58.65 (75.8%)<br>[58.48–58.82] | 58.44 (75.9%)<br>[58.27–58.61] |

Values for V are in L, and are presented as  $G_{\text{mean}}$ , with GCV% within parenthesis, and 95% CI of the  $G_{\text{mean}}$  within square brackets.

$N = 210000$  for each group.

IIV – Inter-individual variability; IOV – Inter-occasion variability.

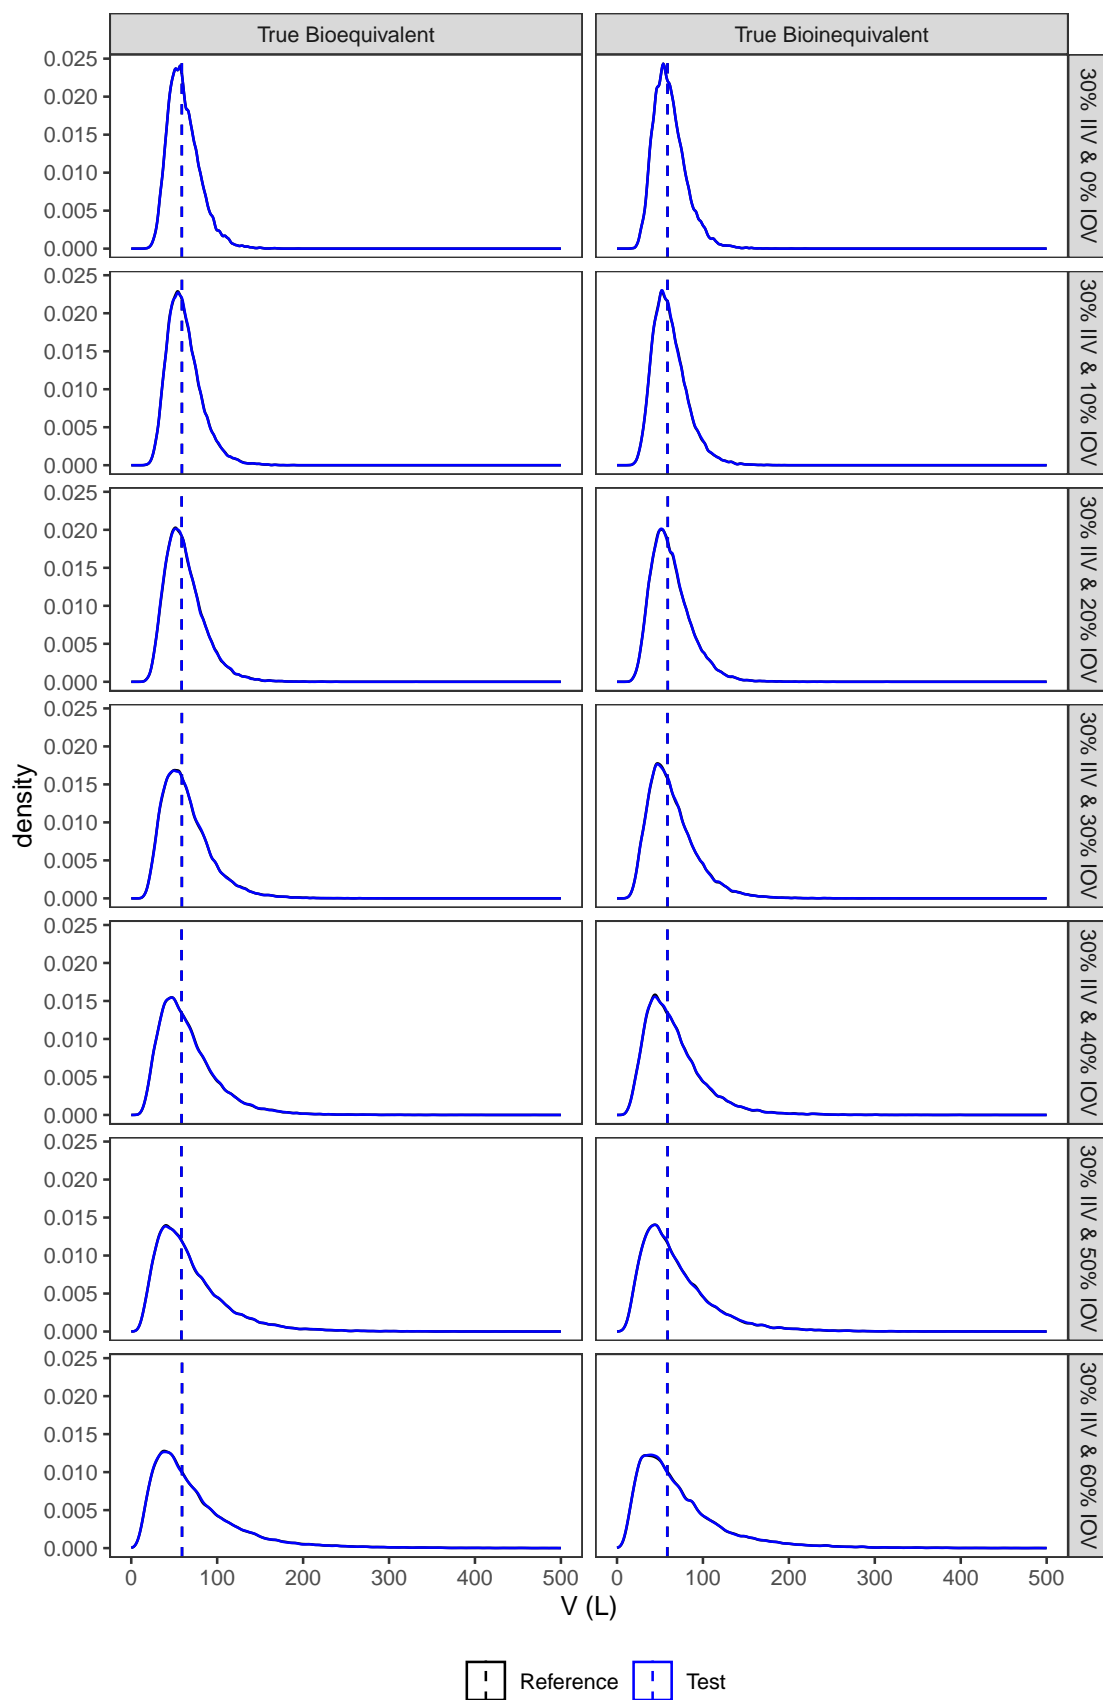

Figure S12: Distribution of Simulated Volume of Distribution, for Simulations where Test Product Presents a Higher Bioavailability than the Reference Product<sup>20</sup>

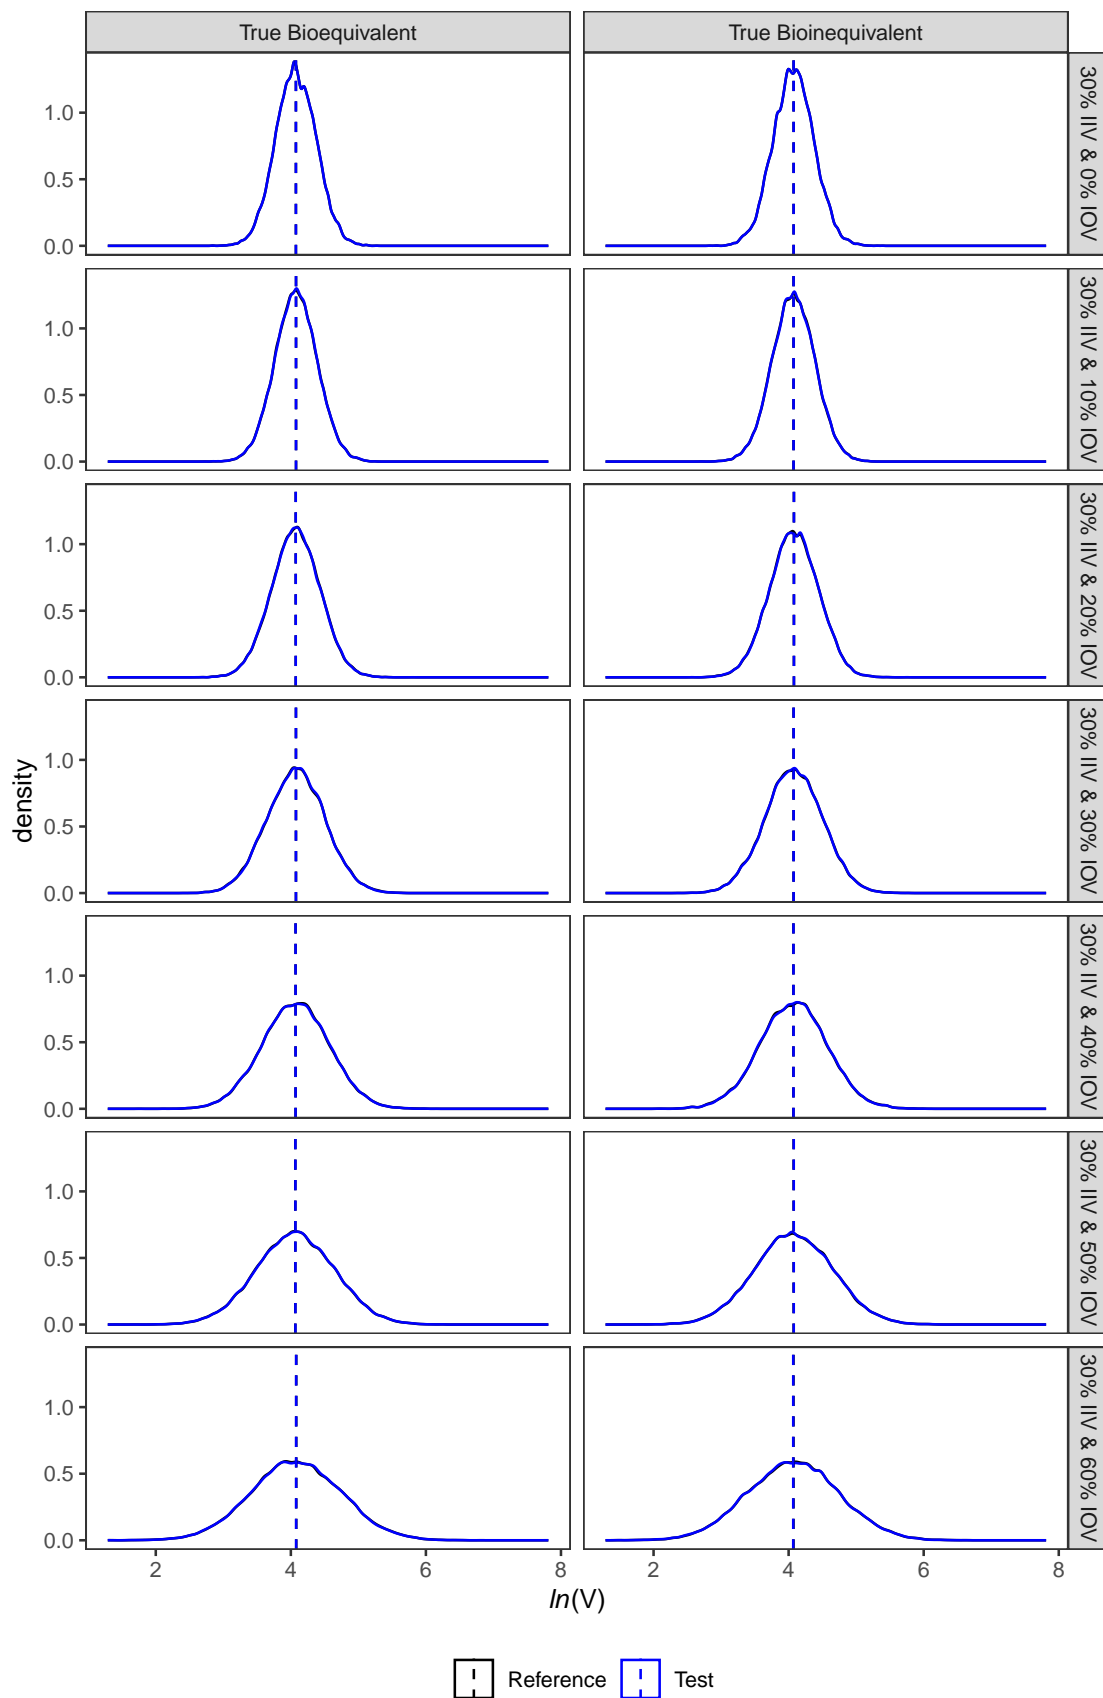

Figure S13: Distribution of  $\ln$ -Transformed Simulated Volume of Distribution, for Simulations where Test Product Presents a Higher Bioavailability than the Reference Product



### S.2.2. Simulated Plasma Concentrations

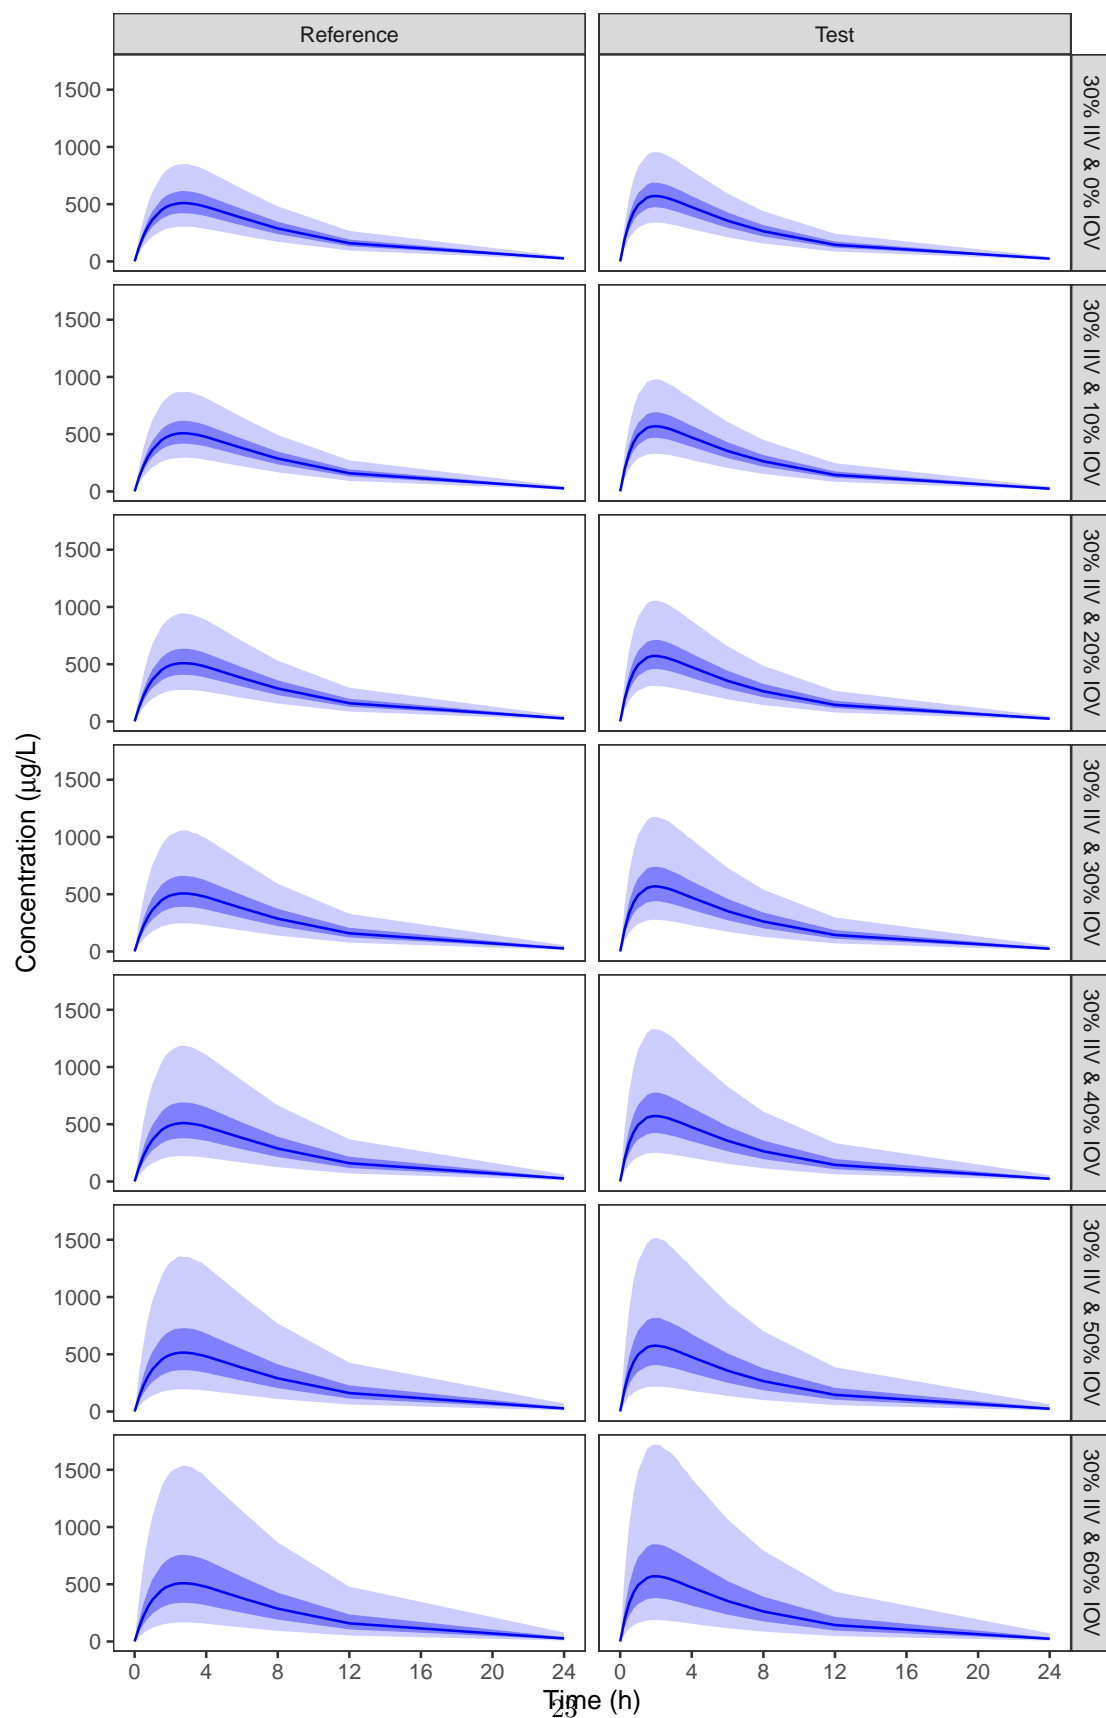

Figure S14: 90% Confidence Interval of Simulated Concentration-Time Data, for True Bioequivalent Simulations where Test Product Presents a Higher Bioavailability than the Reference Product – Linear Scale

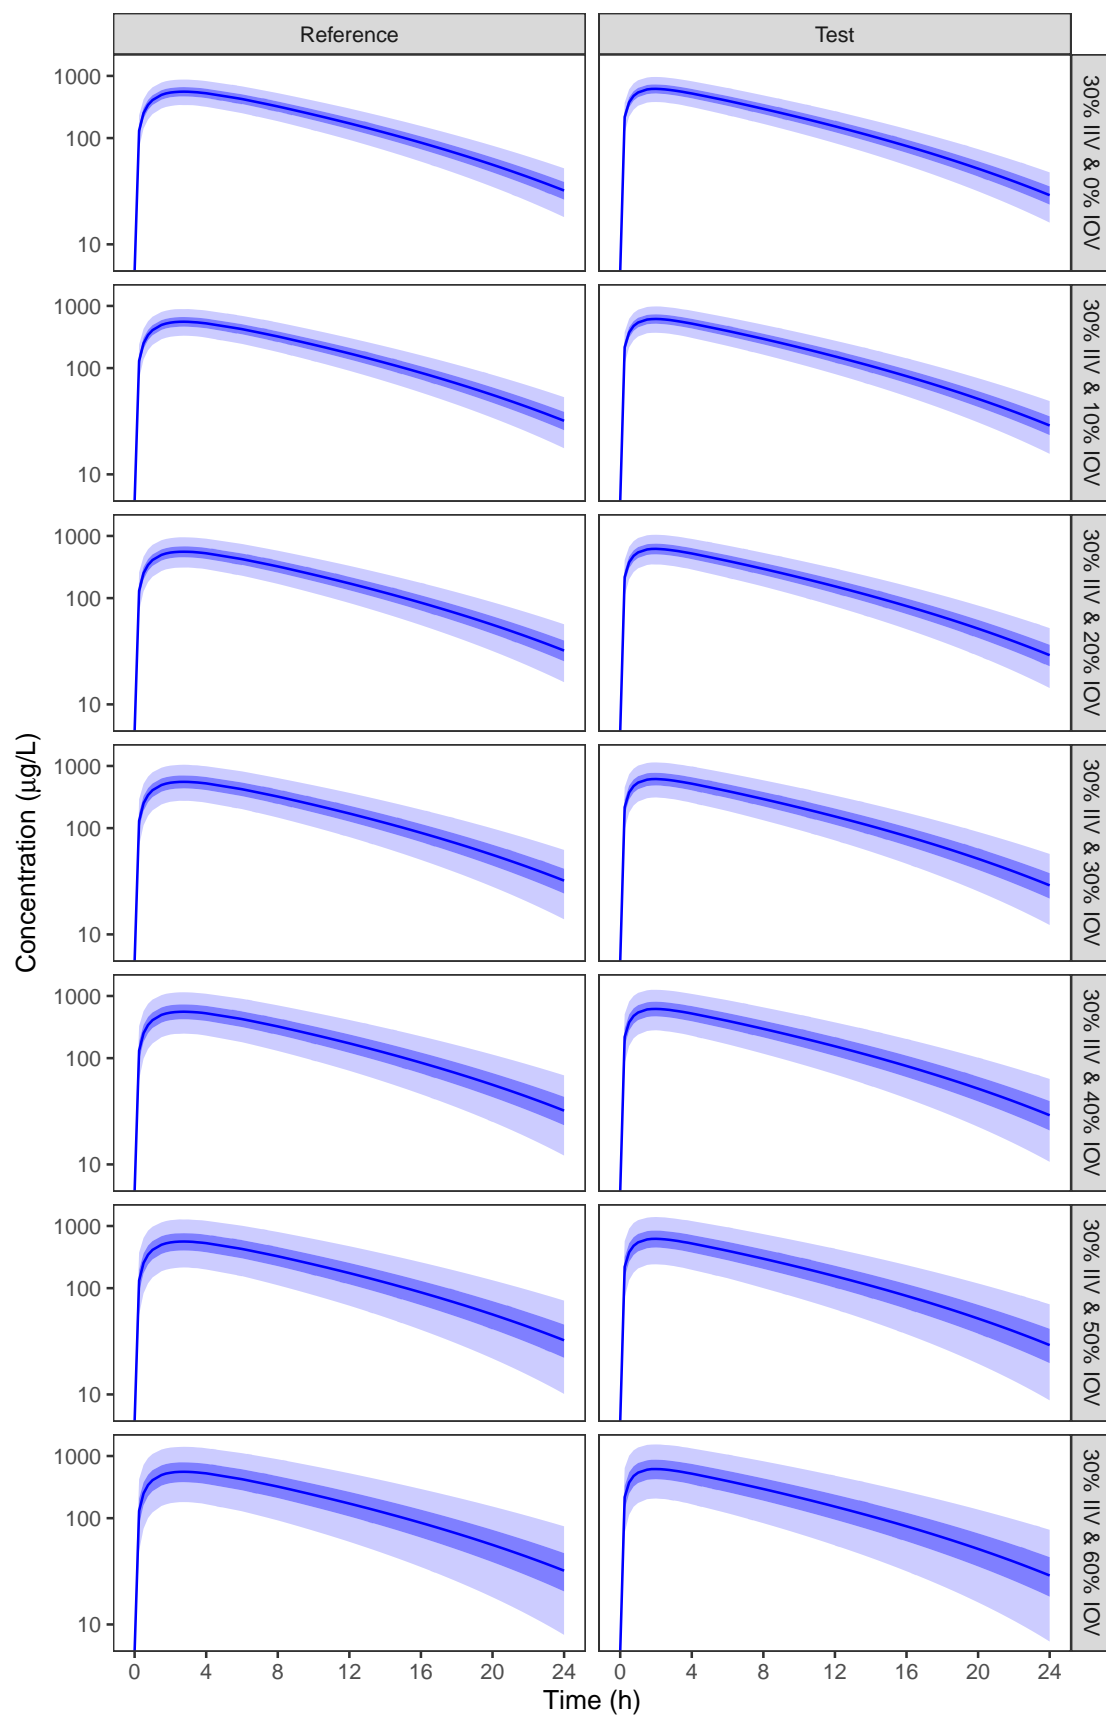

Figure S15: 90% Confidence Interval of Simulated Concentration-Time Data, for True Bioequivalent Simulations where Test Product Presents a Higher Bioavailability than the Reference Product – Semi-Logarithmic Scale

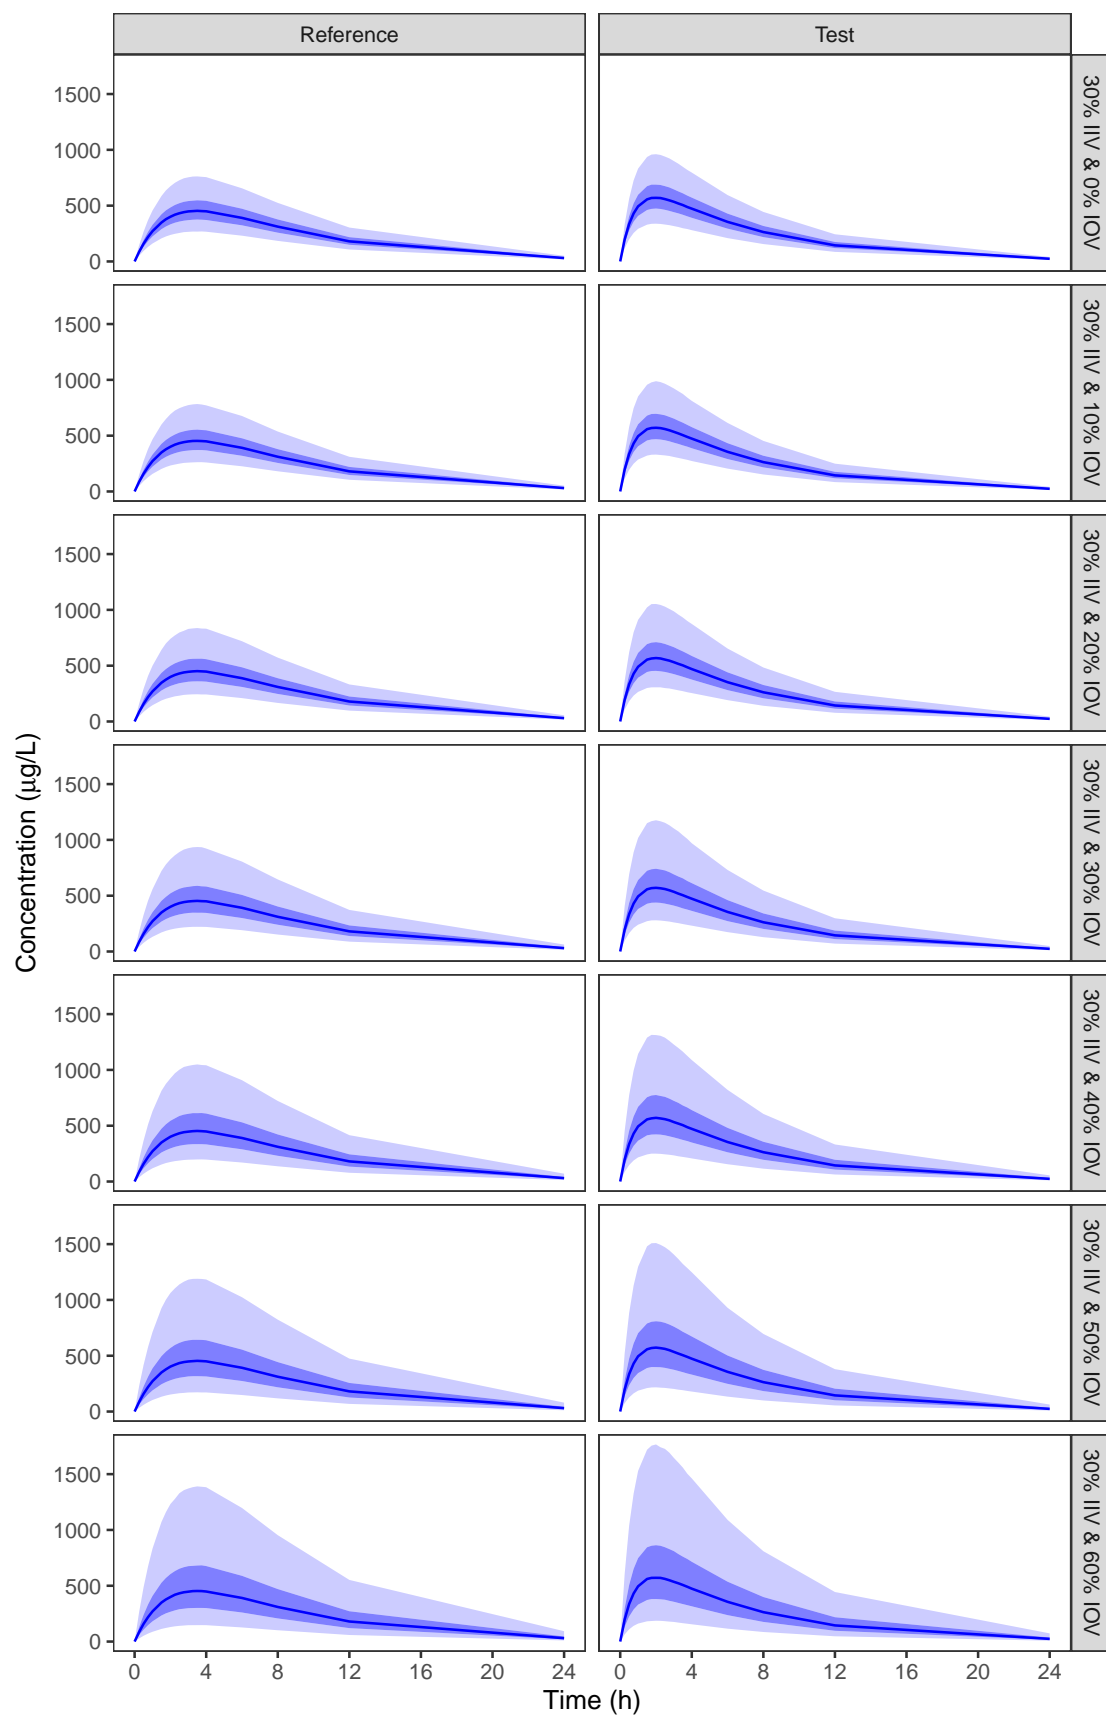

Figure S16: 90% Confidence Interval of Simulated Concentration-Time Data, for True Bioequivalent Simulations where Test Product Presents a Higher Bioavailability than the Reference Product – Linear Scale

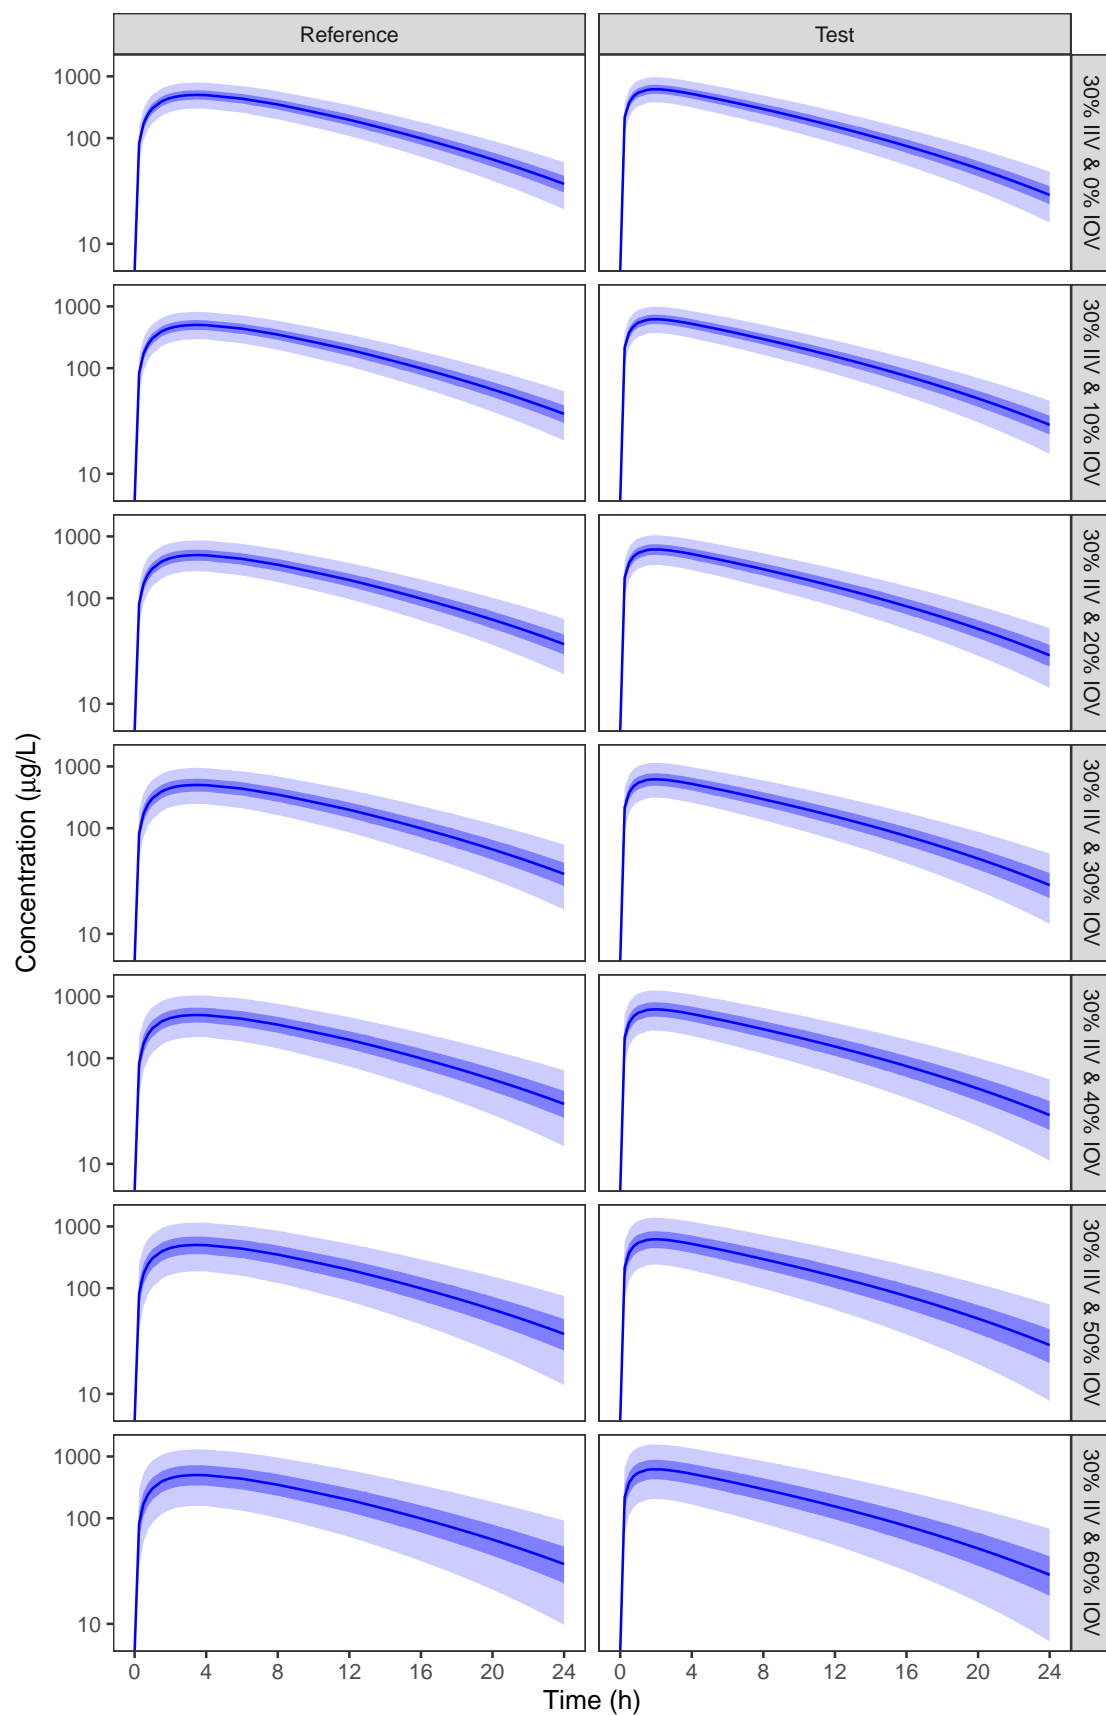

Figure S17: 90% Confidence Interval of Simulated Concentration-Time Data, for True Bioequivalent Simulations where Test Product Presents a Higher Bioavailability than the Reference Product – Semi-Logarithmic Scale

### S.2.3. Simulated Non-Compartmental Analysis Parameters

#### S.2.3.1. Maximum Observed Concentration

Table S6: Summary Statistics of Simulated C<sub>max</sub>, for Simulations where Test Product Presents a Higher Bioavailability than the Reference Product

|                   | True Bioequivalent                |                                   | True Bioinequivalent              |                                   |
|-------------------|-----------------------------------|-----------------------------------|-----------------------------------|-----------------------------------|
|                   | Reference                         | Test                              | Reference                         | Test                              |
| 30% IIV & 0% IOV  | 579.57 (31.2%)<br>[578.82–580.33] | 641.66 (31.3%)<br>[640.82–642.5]  | 513.72 (31.6%)<br>[513.04–514.4]  | 642.8 (31.6%)<br>[641.95–643.64]  |
| 30% IIV & 10% IOV | 578.73 (32.8%)<br>[577.94–579.53] | 641.22 (32.9%)<br>[640.34–642.1]  | 514.2 (33.2%)<br>[513.49–514.91]  | 642.82 (33.1%)<br>[641.93–643.71] |
| 30% IIV & 20% IOV | 580.87 (37.7%)<br>[579.97–581.78] | 644.03 (37.7%)<br>[643.03–645.04] | 511.08 (37.9%)<br>[510.28–511.88] | 639.45 (37.9%)<br>[638.44–640.45] |
| 30% IIV & 30% IOV | 578.83 (45.5%)<br>[577.76–579.91] | 641.05 (45.3%)<br>[639.86–642.23] | 513.89 (45%)<br>[512.95–514.84]   | 642.57 (45%)<br>[641.39–643.76]   |
| 30% IIV & 40% IOV | 582.6 (53.5%)<br>[581.35–583.85]  | 645.29 (53.6%)<br>[643.9–646.67]  | 514.9 (53.6%)<br>[513.79–516.01]  | 643.21 (53.4%)<br>[641.83–644.59] |
| 30% IIV & 50% IOV | 584.74 (63.8%)<br>[583.28–586.2]  | 646.39 (63.9%)<br>[644.78–648.01] | 513.59 (63.9%)<br>[512.3–514.87]  | 641.53 (63.9%)<br>[639.92–643.14] |
| 30% IIV & 60% IOV | 577.22 (75.5%)<br>[575.56–578.88] | 639.92 (75.5%)<br>[638.08–641.76] | 514.87 (76.1%)<br>[513.39–516.36] | 646.34 (76.3%)<br>[644.47–648.22] |

Values for C<sub>max</sub> are in  $\mu\text{g/L}$ , and are presented as G<sub>mean</sub>, with GCV% within parenthesis, and 95% CI of the G<sub>mean</sub> within square brackets.

$N = 210000$  for each group.

IIV – Inter-individual variability; IOV – Inter-occasion variability.

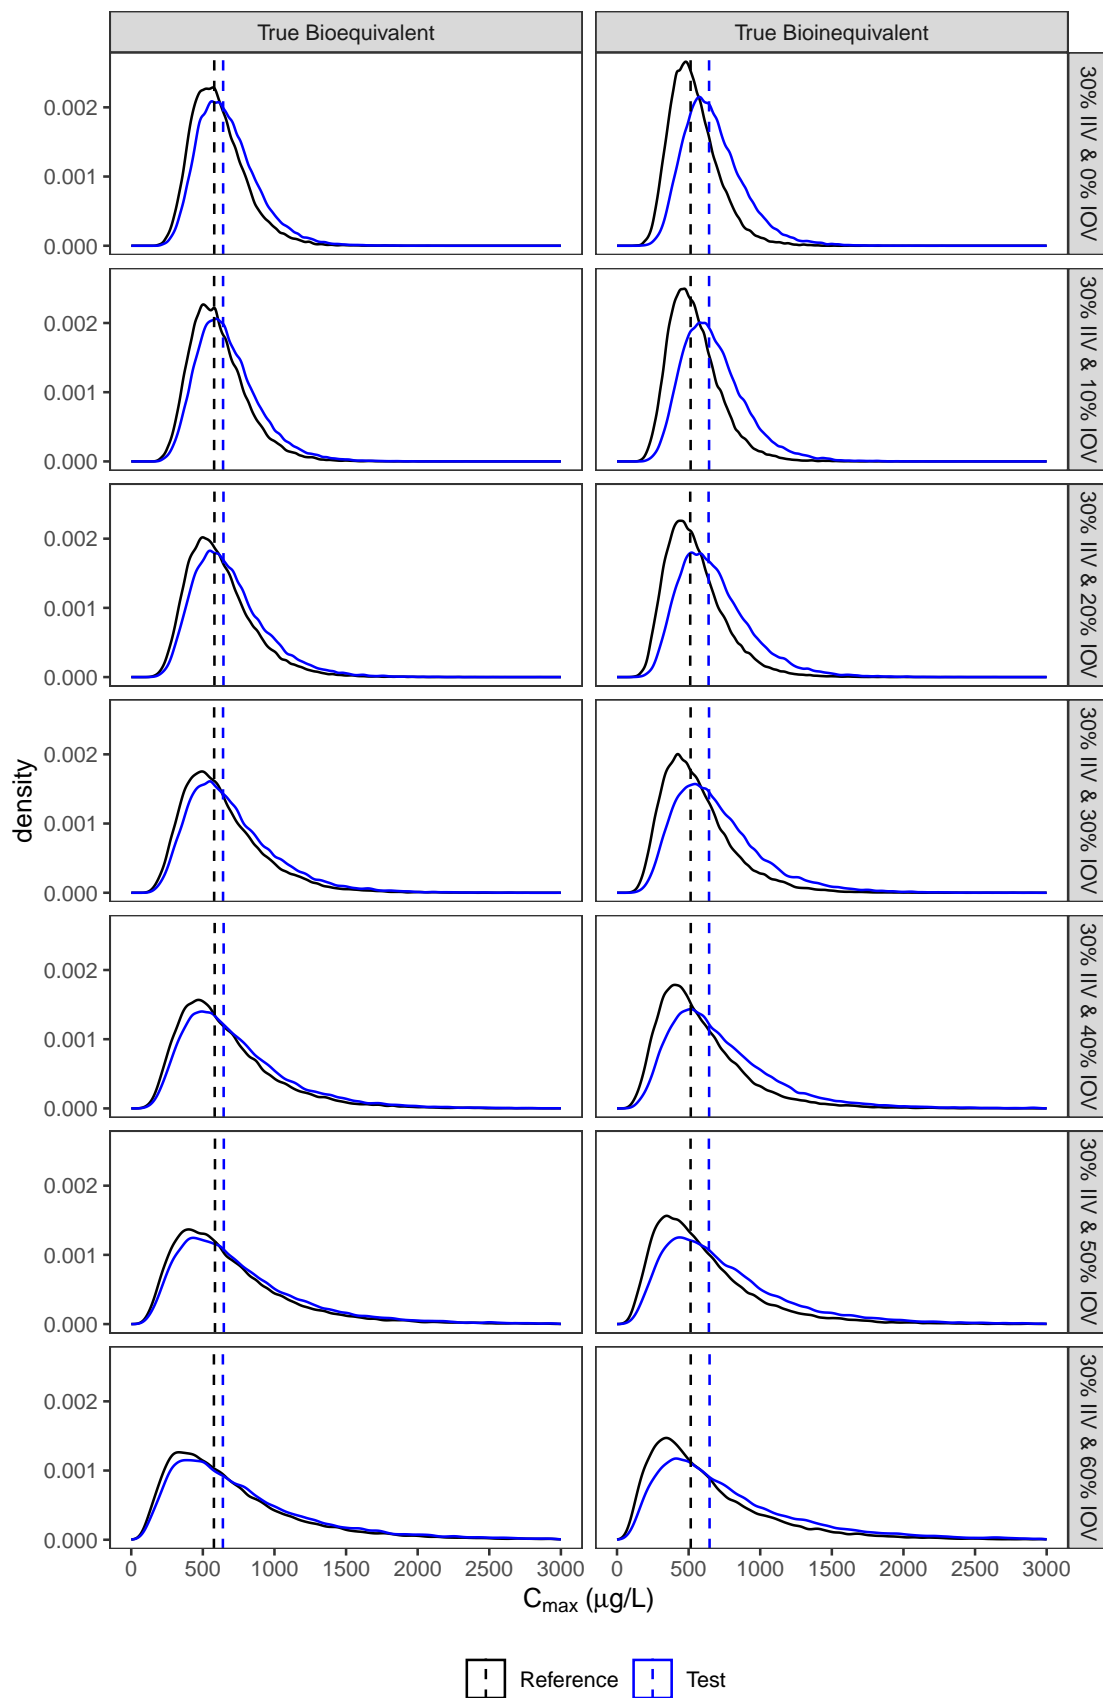

Figure S18: Distribution of Observed  $C_{max}$ , for Simulations where Test Product Presents a Higher Bioavailability than the Reference Product

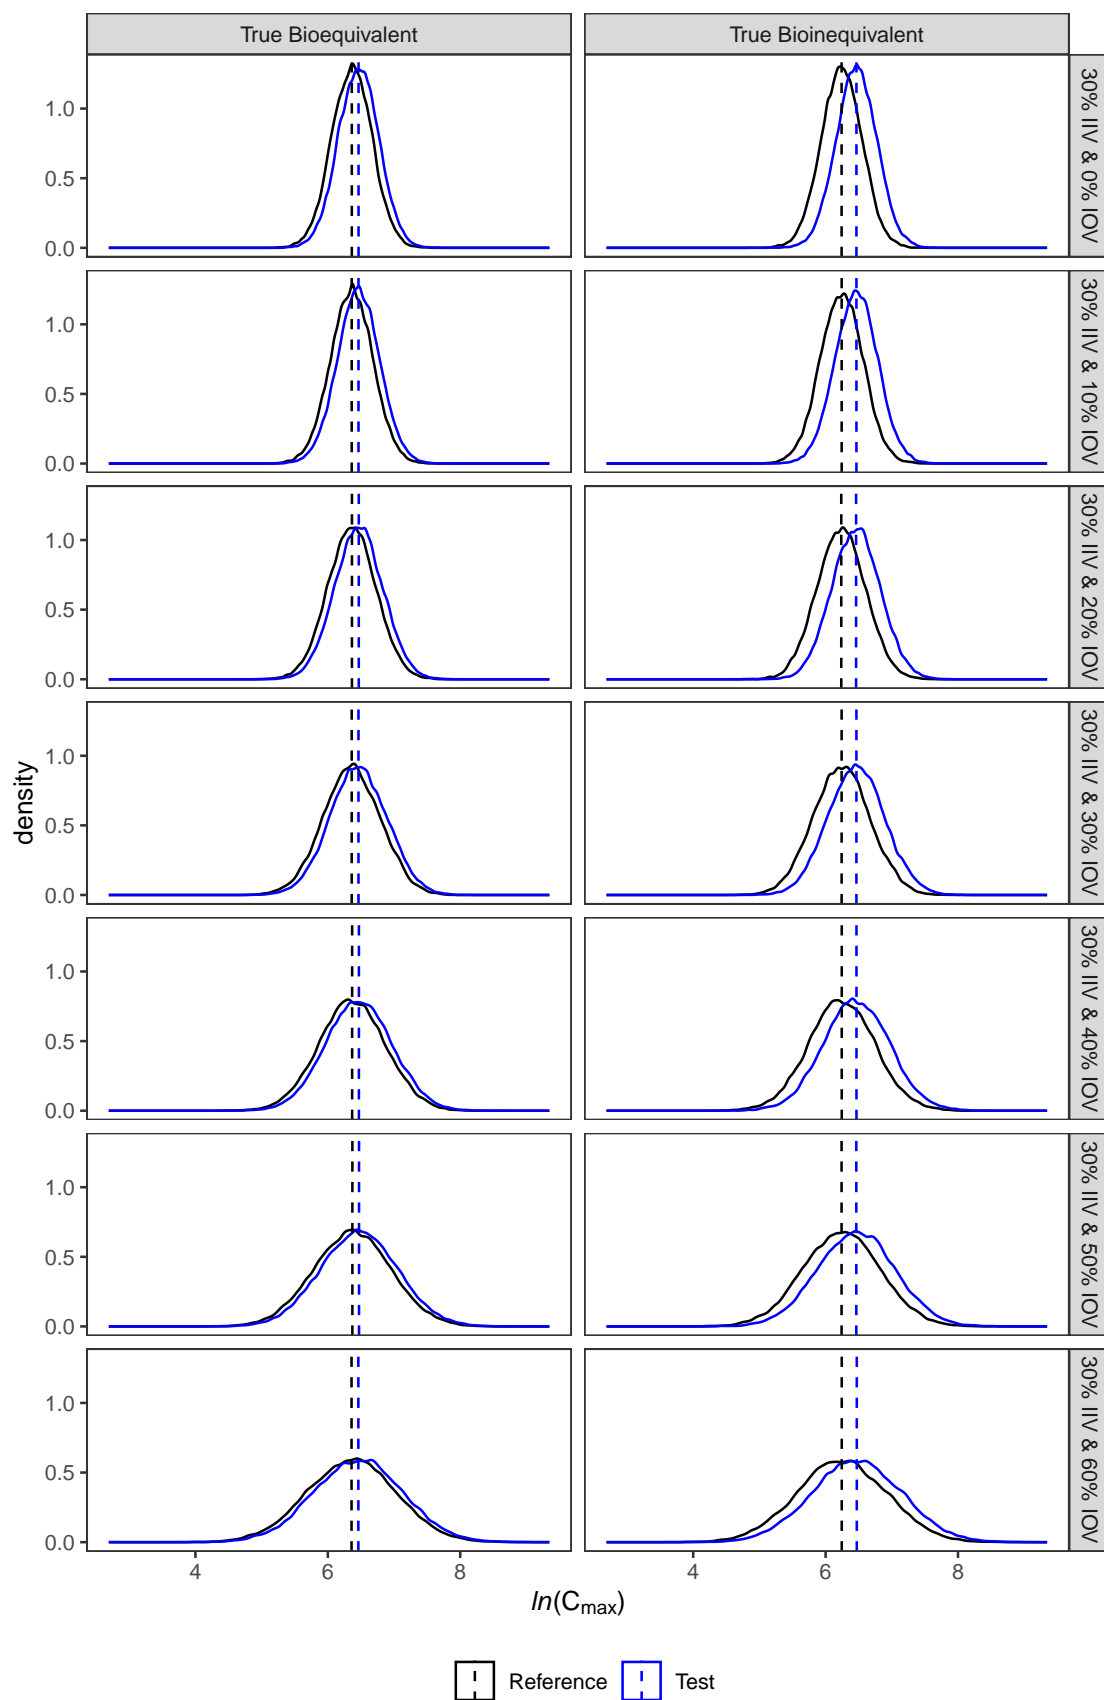

Figure S19: Distribution of  $\ln$ -Transformed Observed  $C_{\max}$ , for Simulations where Test Product Presents a Higher Bioavailability than the Reference Product 29

### S.2.3.2. Time of Maximum Observed Concentration

Table S7: Summary Statistics of Simulated C<sub>max</sub>, for Simulations where Test Product Presents a Higher Bioavailability than the Reference Product

|                   | True Bioequivalent |               | True Bioinequivalent |               |
|-------------------|--------------------|---------------|----------------------|---------------|
|                   | Reference          | Test          | Reference            | Test          |
| 30% IIV & 0% IOV  | 2.75 (1–6)         | 2.25 (0.75–4) | 3.25 (1.5–6)         | 2.25 (0.75–4) |
| 30% IIV & 10% IOV | 2.75 (1.5–6)       | 2.25 (0.75–4) | 3.25 (1.5–6)         | 2.25 (0.75–4) |
| 30% IIV & 20% IOV | 2.75 (1–6)         | 2.25 (0.75–4) | 3.25 (1.5–6)         | 2.25 (0.75–4) |
| 30% IIV & 30% IOV | 2.75 (1–4)         | 2.25 (0.75–4) | 3.25 (1.5–6)         | 2.25 (0.75–4) |
| 30% IIV & 40% IOV | 2.75 (1–6)         | 2.25 (0.75–4) | 3.25 (1.5–8)         | 2.25 (1–4)    |
| 30% IIV & 50% IOV | 2.75 (1.5–6)       | 2.25 (0.75–4) | 3.25 (1.5–6)         | 2.25 (0.75–4) |
| 30% IIV & 60% IOV | 2.75 (1–6)         | 2.25 (0.75–4) | 3.25 (1.5–6)         | 2.25 (0.75–4) |

Values for  $t_{\max}$  are in hours (h), and are presented as median with range within parenthesis.

$N = 210000$  for each group.

IIV – Inter-individual variability; IOV – Inter-occasion variability.

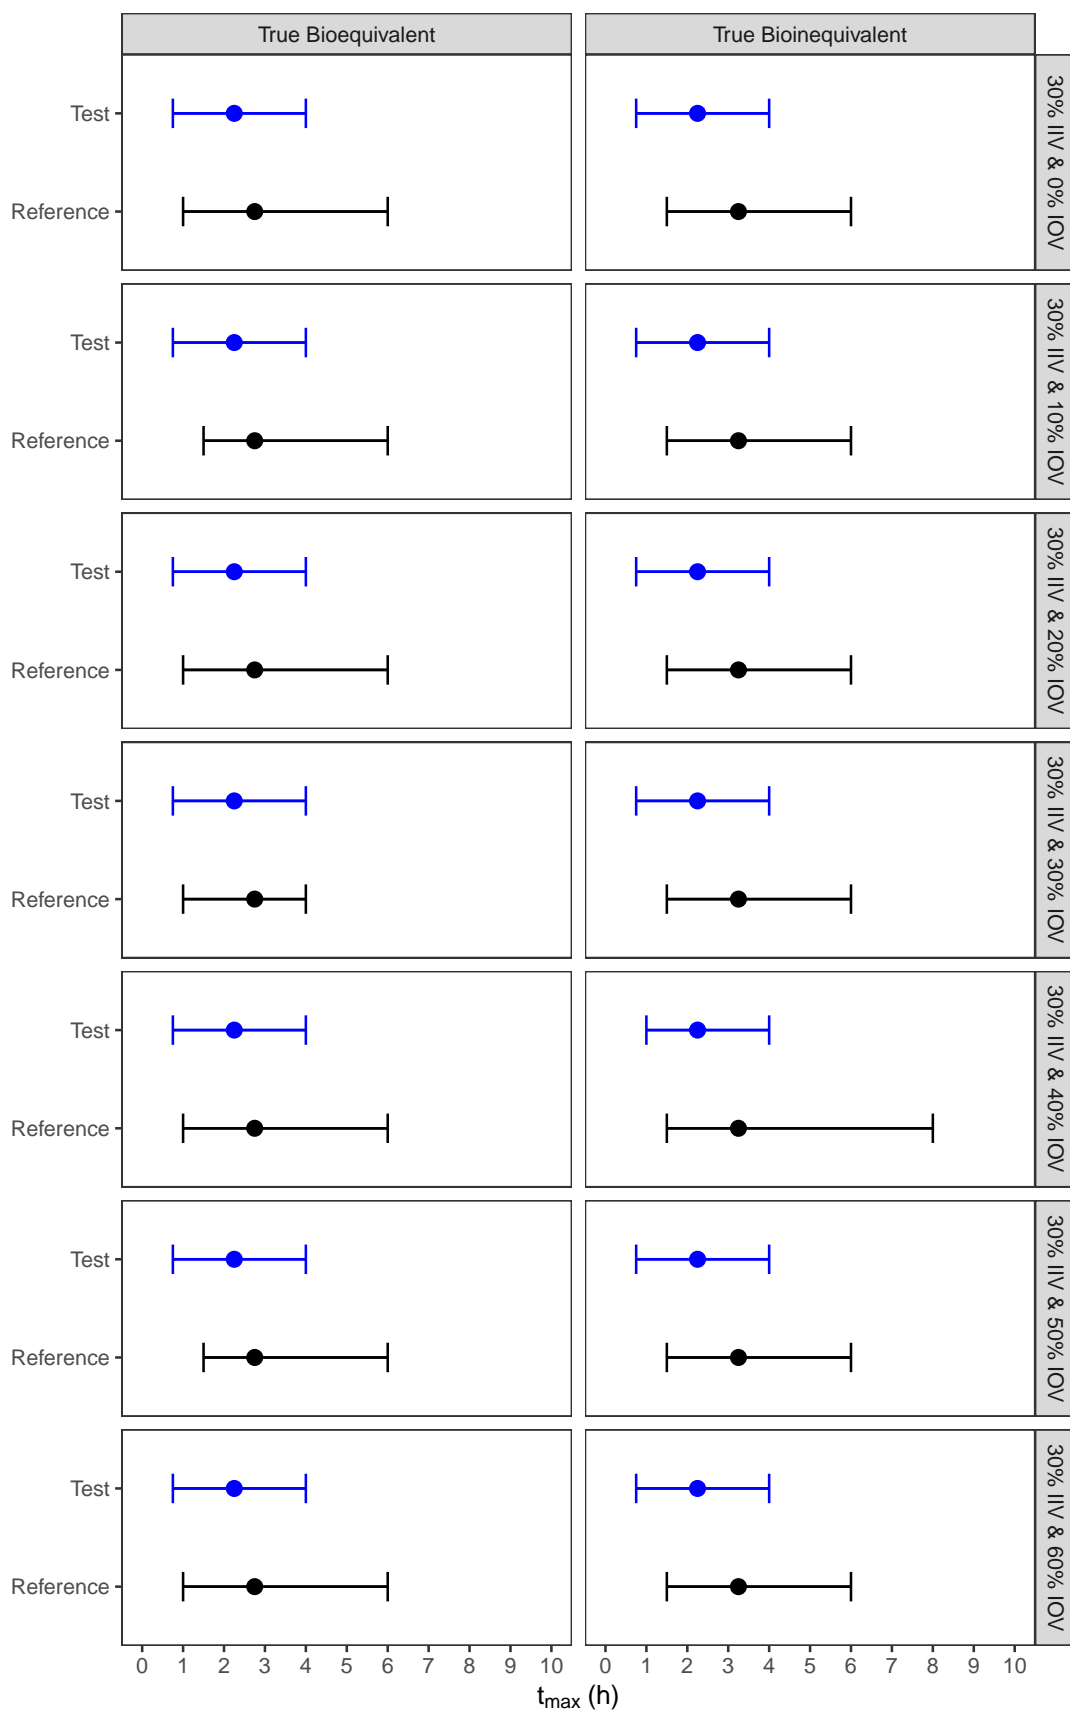

Figure S20: Distribution of Observed  $T_{max}$ , for Simulations where Test Product Presents a Higher Bioavailability than the Reference Product

### S.2.3.3. Area Under the Concentration-Time Curve

Table S8: Summary Statistics of Simulated AUC<sub>0-t</sub>, for Simulations where Test Product Presents a Higher Bioavailability than the Reference Product

|                   | True Bioequivalent                   |                                      | True Bioinequivalent                 |                                      |
|-------------------|--------------------------------------|--------------------------------------|--------------------------------------|--------------------------------------|
|                   | Reference                            | Test                                 | Reference                            | Test                                 |
| 30% IIV & 0% IOV  | 4924.2 (30.8%)<br>[4917.87–4930.54]  | 4946.53 (30.8%)<br>[4940.17–4952.89] | 4891.58 (31.1%)<br>[4885.22–4897.95] | 4952.6 (31.1%)<br>[4946.17–4959.03]  |
| 30% IIV & 10% IOV | 4915.98 (32.4%)<br>[4909.34–4922.62] | 4938.35 (32.4%)<br>[4931.69–4945.03] | 4895.03 (32.8%)<br>[4888.35–4901.73] | 4953.92 (32.7%)<br>[4947.16–4960.68] |
| 30% IIV & 20% IOV | 4935.43 (37.3%)<br>[4927.82–4943.05] | 4961.53 (37.3%)<br>[4953.88–4969.19] | 4867.23 (37.6%)<br>[4859.67–4874.81] | 4926.92 (37.6%)<br>[4919.27–4934.58] |
| 30% IIV & 30% IOV | 4921.22 (45.2%)<br>[4912.16–4930.3]  | 4943.32 (44.9%)<br>[4934.26–4952.4]  | 4895.59 (44.7%)<br>[4886.66–4904.53] | 4953.01 (44.7%)<br>[4943.98–4962.06] |
| 30% IIV & 40% IOV | 4949.14 (53.2%)<br>[4938.58–4959.72] | 4972.44 (53.3%)<br>[4961.82–4983.09] | 4904.24 (53.3%)<br>[4893.76–4914.73] | 4959.13 (53.1%)<br>[4948.58–4969.71] |
| 30% IIV & 50% IOV | 4969.5 (63.6%)<br>[4957.13–4981.9]   | 4982.45 (63.6%)<br>[4970.04–4994.89] | 4888.86 (63.6%)<br>[4876.68–4901.07] | 4941.64 (63.6%)<br>[4929.33–4953.97] |
| 30% IIV & 60% IOV | 4900.56 (75.2%)<br>[4886.54–4914.62] | 4927.91 (75.3%)<br>[4913.82–4942.05] | 4902.43 (75.8%)<br>[4888.31–4916.58] | 4981.22 (75.9%)<br>[4966.86–4995.61] |

Values for AUC<sub>0-t</sub> are in  $\mu\text{g}\cdot\text{h}/\text{L}$ , and are presented as  $G_{\text{mean}}$ , with GCV% within parenthesis, and 95% CI of the  $G_{\text{mean}}$  within square brackets.

$N = 210000$  for each group.

IIV – Inter-individual variability; IOV – Inter-occasion variability.

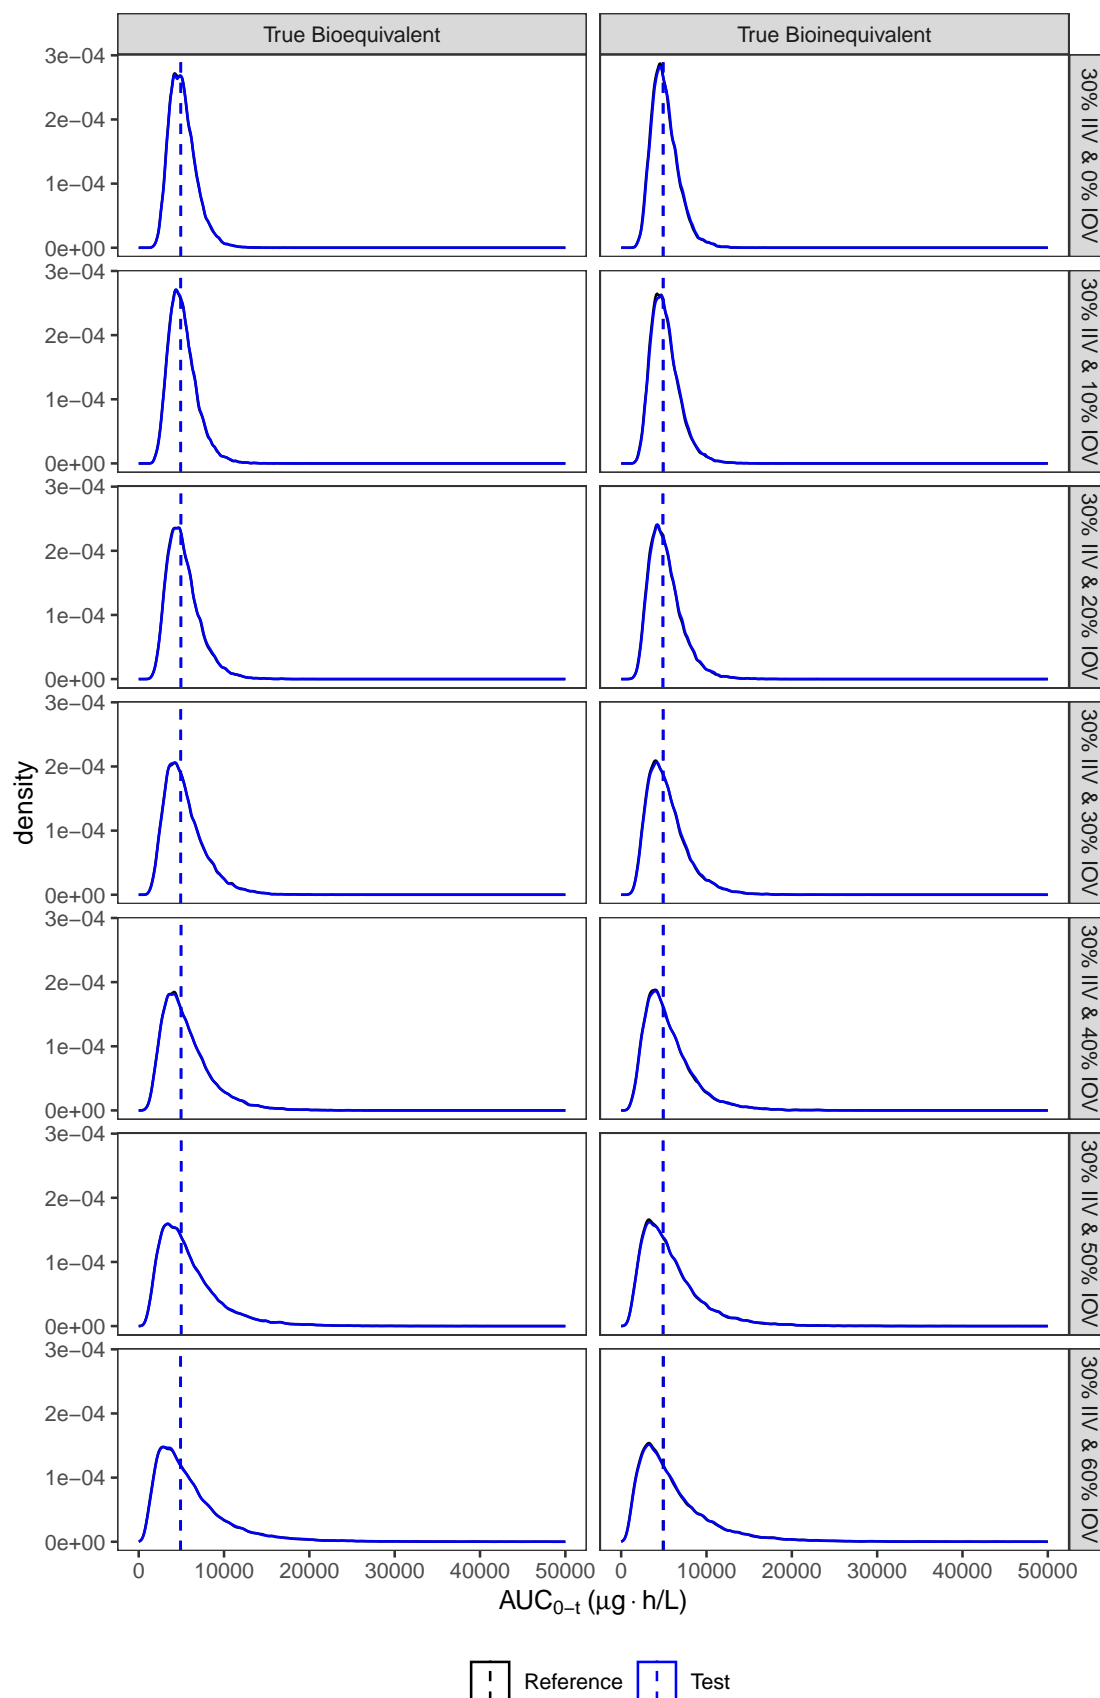

Figure S21: Distribution of Observed  $AUC_{0-t}$ , for Simulations where Test Product Presents a Higher Bioavailability than the Reference Product

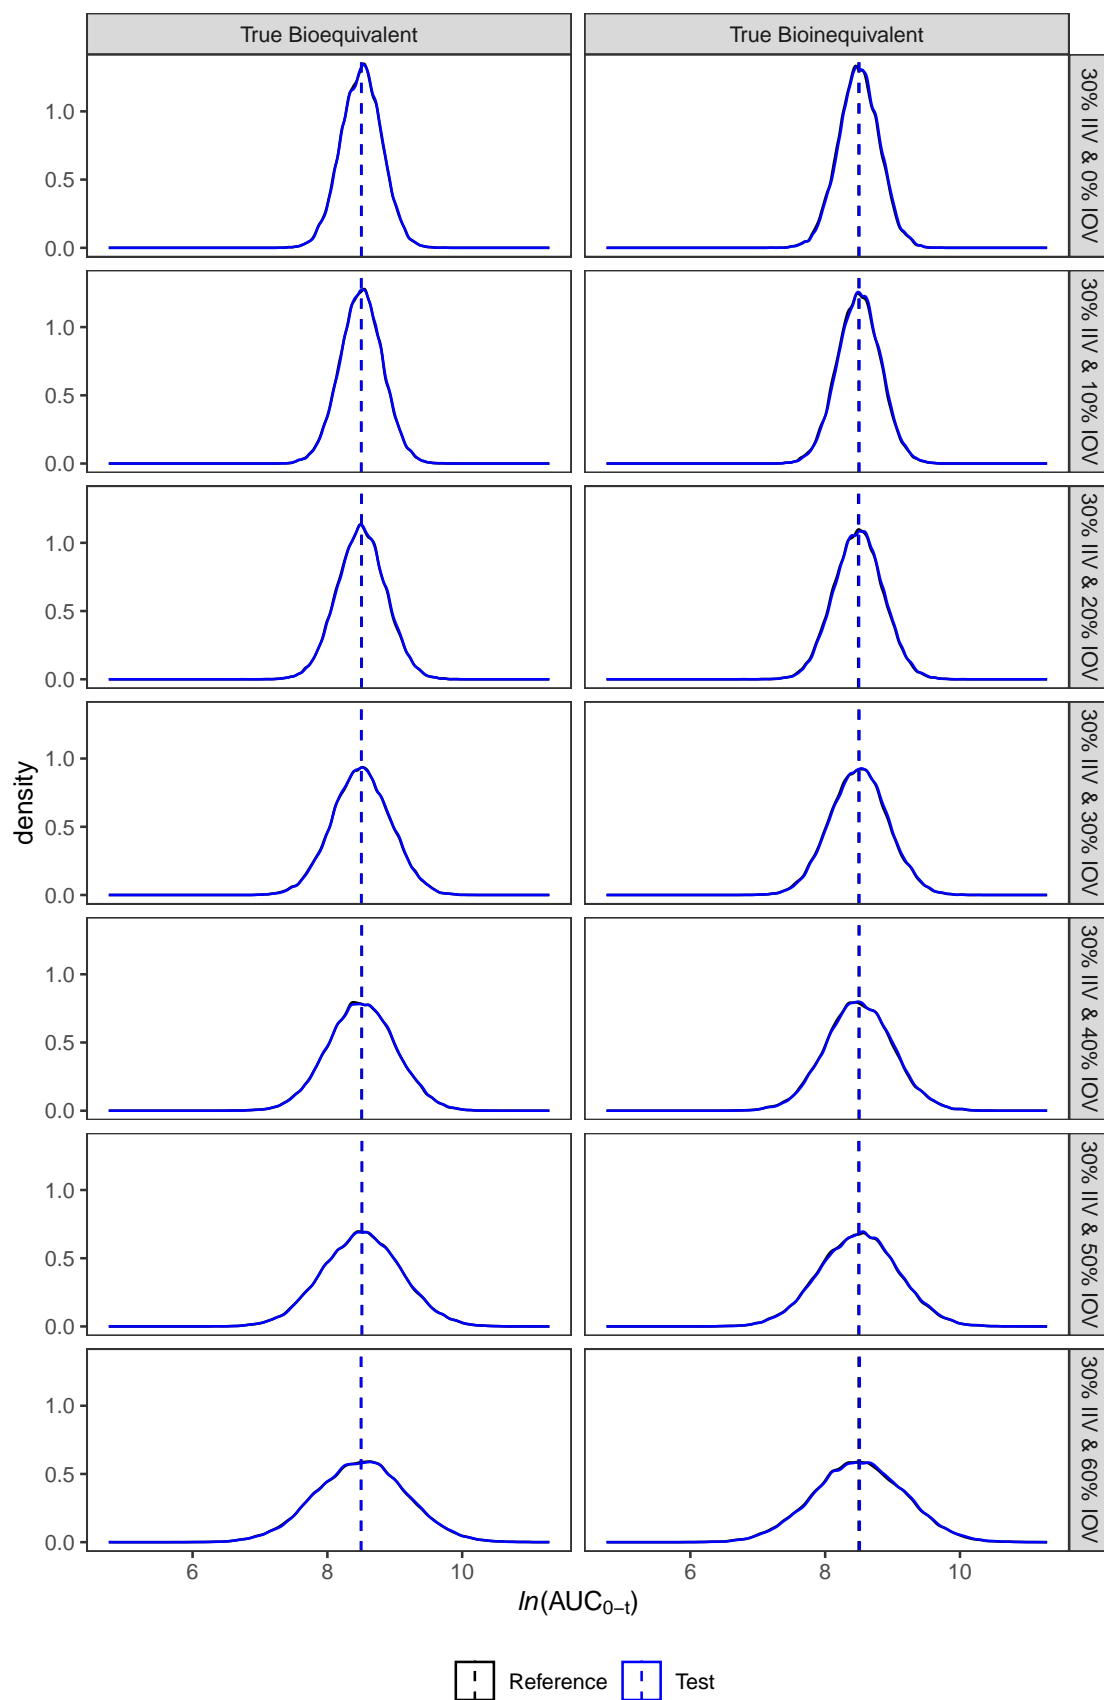

Figure S22: Distribution of  $\ln$ -Transformed Observed  $\text{AUC}_{0-t}$ , for Simulations where Test Product Presents a Higher Bioavailability than the Reference Product<sup>34</sup>
